# Supplementary material for: Low Diversity and Strong Genetic Structure Between Feeding and Nesting Areas in Brazil for the Critically Endangered Hawksbill Sea Turtle
Source: Frontiers journal article supplement (doi:10.3389/fevo.2021.704838), 2021-08-04
Supplement: Table_1.xlsx [file Table_1.xlsx]

## Sheet: Plan1
Supplementary table 3: Eretmochelys imbricata haplotype sequences from nesting areas and haplotype sequences from feeding areas (Genbak data) used in this study.
Locality (Brazil)	Sequence	Haplotype name to deposit in the database (in this study)
Sequence 1 Piauí (PI_BRA)	CGCTTAACCCCCTAAAGCATTGGTCTTGTAAA-CCAAAGATTGAAAAA-----CTAT---AACT--TTCCTAGAATAA-TCAAAAGAGAAGGACTCAAAC-CTTCATCCCCCGGCCCCCCAAAACCGGAATC-TTTTAATTAAACTATCCCTT-GACGCAGAATAAGC-GCCAACACATAAACTTACCTATATCCTC-TACCGTGCCCAGCAGACCAATATCCGCAACACTTACCTATGTACTATTGTACATCTACTTATTTACCACTAGCATATGACCAGTAGTACTGCTGATTAATCTGACCTAAAA-CATAAAA--TTATTGG-TTTTACATAAACTGTTTAAACTACATGACTATTATACAGGTAATAAGAATGAAATGGTATAGG--ACATAAT…	PI_BRAEi1
Sequence 2 Piauí (PI_BRA)	--------------GCTTACCCTAAGCATTGT-CTGTAAACAAAGAT------GAAA---CTAT--ACTTCCTAGATA-ATCAAAGAGAAGGACTCAAAC-CTTCATCCCCGG--CCCCCAAAACCGGAATC-TTTTAATTAAACTATCCCTT-GACGCAGAATAAGC-GCCAACACATAAACTTACCTATATCCTC-TACCGTGCCCAGCAGACCAATATCCGCAACACTTACCTATGTACTATTGTACATCTACTTATTTACCACTAGCATATGACCAGTAGTACTGCTGATTAATCTGACCTAAAA-CATAAAA--TTATTGG-TTTTACATAAACTGTTTAAACTACATGACTATTATACAGGTAATAAGAATGAAATGGTATAGG--ACATAAT…	PI_BRAEi2
Sequence 3 Piauí (PI_BRA)	---------------------GGTCTTGTAAA-CCAAAGATTGAAAA------CTAT---AACT--TTCCTAGAATAA-TCAAAAGAGAAGGACTCAAAC-CTTCATCCCC-GGCCCCCCAAAACCGGAATC-TTTTAATTAAACTATCCCTT-GACGCAGAATAAGCGCC-AACACATAAACTTACCTATATCCTC-TACCGTGCCCAGCAGACCAATATCCGCAACACTTACCTATGTACTATTGTACATCTACTTATTTACCACTAGCATATGACCAGTAGTACTGCTGATTAATCTGACCTAAAA-CATAAAA--TTATTGG-TTTTACATAAACTGTTTAAACTACATGACTATTATACAGGTAATAAGAATGAAATGGTATAGG--ACATAAT…	PI_BRAEi3
Sequence 4 Piauí (PI_BRA)	--------------------GGTCTTGTAAA--CCAAAGATTGAAAA------CTAT---AACT--TTCCTAGAATAA-TCAAAAGAGAAGGACTCAAACCTTTCATCCCCGG-CCCCCCAAAACCGGAATC-TTTTAATTAAACTATCCCTT-GACGCAGAATAAGC-GCCAACACATAAACTTACCTATATCCTC-TACCGTGCCCAGCAGACCAATATCCGCAACACTTACCTATGTACTATTGTACATCTACTTATTTACCACTAGCATATGACCAGTAGTACTGCTGATTAATCTGACCTAAAA-CATAAAA--TTATTGG-TTTTACATAAACTGTTTAAACTACATGACTATTATACAGGTAATAAGAATGAAATGGTATAGG--ACATAAT…	PI_BRAEi4
Sequence 1 Paraíba (PB_BRA)	------------CTAAGCATTGGTCTTGTAAA-CCAAAGATTGAAAA------CTAT---AACT--TTCCTAGAATAA-TCAAAAGAGAAGGACTCAAAC-CTTCATCCCC-GGCCCCCCAAAACCGGAATC-TTTTAATTAAACTATCCCTT-GACGCAGAATAAGCGCcCAACACATAAACTTACCTATATCCTCCTACCGTGCCCAGCAGACCAATATCCGCAACACTTACCTATGTACTATTGTACATCTACTTATTTACCACTAGCATATGACCAGTAGTACTGCTGATTAATCTGACCTAAAA-CATAAAA--TTATTGG-TTTTACATAAACTGTTTAAACTACATGACTATTATACAGGTAATAAGAATGAAATGGTATAGG--ACATAAT…	PB_BRAEi1
Sequence 2 Paraíba (PB_BRA)	--------------A-GCATTGGTCTTGTAAA-CCAAAGATTGAAAA------CTAT---AACT--TTCCTAGAATAA-TCAAAAGAGAAGGACTCAAAC-CTTCATCCCC-GGCCCCCCAAAACCGGAATC-TTTTAATTAAACTATCCCTT-GACGCAGAATAAGCGCC-AACACATAAACTTACCTATATCCTC-TACCGTGCCCAGCAGACCAATATCCGCAACACTTACCTATGTACTATTGTACATCTACTTATTTACCACTAGCATATGACCAGTAGTACTGCTGATTAATCTGACCTAAAA-CATAAAA--TTATTGG-TTTTACATAAACTGTTTAAACTACATGACTATTATACAGGTAATAAGAATGAAATGGTATAGG--ACATAAT…	PB_BRAEi2
Sequence 3 Paraíba (PB_BRA)	-----------------CAT-GGTCT-GTAAA-CCAAAGATTGAAAA------CTAT---AACT--T-CCTAGAATAA-TCAAAAGAGAAGGACTCAAAC-CTTCATCCCC-GGCCCCCCAAAACCGGAATC-TTTTAATTAAACTATCCCTT-GACGCAGAATAAGCGCC-AACACATAAACTTACCTATATCCTC-TACCGTGCCCAGCAGACCAATATCCGCAACACTTACCTATGTACTATTGTACATCTACTTATTTACCACTAGCATATGACCAGTAGTACTGCTGATTAATCTGACCTAAAA-CATAAAA--TTATTGG-TTTTACATAAACTGTTTAAACTACATGACTATTATACAGGTAATAAGAATGAAATGGTATAGG--ACATAAT…	PB_BRAEi3
Sequence 4 Paraíba (PB_BRA)	---------------AGCATTGGTCTTGTAAA-CCAAAGATTGAAAA------CTAT---AACT--TTCCTAGAATAA-TCAAAAGAGAAGGACTCAAAC-CTTCATCCCCCGGCCCCCCAAAACCGGAATC-TTTTAATTAAACTATCCCTT-GACGCAGAATAAGCGCC-AACACATAAACTTACCTATATCCTC-TACCGTGCCCAGCAGACCAATATCCGCAACACTTACCTATGTACTATTGTACATCTACTTATTTACCACTAGCATATGACCAGTAGTACTGCTGATTAATCTGACCTAAAA-CATAAAA--TTATTGG-TTTTACATAAACTGTTTAAACTACATGACTATTATACAGGTAATAAGAATGAAATGGTATAGG--ACATAAT…	PB_BRAEi4
Sequence 5 Paraíba (PB_BRA)	-GCTTAACCCCCTAA-GCATTGGTCTTGTAAA-CCAAAGATTGAAAA------CTAT---AACT--TTCCTAGAATAA-TCAAAAGAGAAGGACTCAAAC-CTTCATCCCC-GGCCCCCCAAAACCGGAATC-TTTTAATTAAACTATCCCTT-GACGCAGAATAAGC-GCCAACACATAAACTTACCTATATCCTC-TACCGTGCCCAGCAGACCAATATCCGCAACACTTACCTATGTACTATTGTACATCTACTTATTTACCACTAGCATATGACCAGTAGTACTGCTGATTAATCTGACCTAAAA-CATAAAA--TTATTGG-TTTTACATAAACTGTTTAAACTACATGACTATTATACAGGTAATAAGAATGAAATGGTATAGG--ACATAAT…	PB_BRAEi5
Sequence 6 Paraíba (PB_BRA)	----------------------------A-CC--AAAAGA-TGAAAA------CTAT---AACT--TTCCTAGAATAA-TCAAAAGAG--GG--TCAAAC-CT--ATCCCCCGGCCCCCCAAAACCGGAATC-TTTTAATTAAACTATCCCTT-GACGCAGAATAAGCCGCCAACACATAAACTTACCTATATCCTC-TACCGTGCCCAGCAGACCAATATCCGCAACACTTACCTATGTACTATTGTACATCTACTTATTTACCACTAGCATATGACCAGTAGTACTGCTGATTAATCTGACCTAAAA-CATAAAA--TTATTGG-TTTTACATAAACTGTTTAAACTACATGACTATTATACAGGTAATAAGAATGAAATGGTATAGG--ACATAAT…	PB_BRAEi6
Sequence 7 Paraíba (PB_BRA)	-------------------TGT-GCTAGCCCT-AGCATGTCTTGTAG------CAAG---TGAA--ACTTACTCCTGA-AATAAAAGGAAGGACTCAAAC-CTTCATCCCCGG--CCCCCAAAACCGGAATC-TTTTAATTAAACTATCcCTT-GACGCAGAAtAAGC-GCCAACACATAAACTTACCTATATCCTC-TACCGTGCCCAGCAGACCAATATCCGCAACACTTACCTATGTACTATTGTACATCTACTTATTTACCACTAGCATATGACCAGTAGTACTGCTGATTAATCTGACCTAAAA-CATAAAA--TTATTGG-TTTTACATAAACTGTTTAAACTACATGACTATTATACAGGTAATAAGAATGAAATGGTATAGG--ACATAAT…	PB_BRAEi7
Sequence 8 Paraíba (PB_BRA)	----------------GCATTGGTCTTGTAAA-CCAAAGATTGAAAA------CTAT---AACT--TTCCTAGAATAA-TCAAAAGAGAAGGACTCAAACCGTTCATCCCCGG--CCCCCAAAACCGGAATC-TTTTAATTAAACTATCCCTT-GACGCAGAATAAGC-GCCAACACATAAACTTACCTATATCCTC-TACCGTGCCCAGCAGACCAATATCCGCAACACTTACCTATGTACTATTGTACATCTACTTATTTACCACTAGCATATGACCAGTAGTACTGCTGATTAATCTGACCTAAAA-CATAAAA--TTATTGG-TTTTACATAAACTGTTTAAACTACATGACTATTATACAGGTAATAAGAATGAAATGGTATAGG--ACATAAT…	PB_BRAEi8
Sequence 9 Paraíba (PB_BRA)	---------------AGCATTGGTCTTGTAAA-CCAAAGA-TGAAAA------CTAT---AACT--TTC-TAGA-T-A---AA-AGAGAAGGACTCAAACC-TTCATCCCCGG--CCCCCAAAACCGGAATC-TTTTAATTAAACTATCCCTT-GACGCAGAATAAGC-GCCAACACATAAACTTACCTATATCCTC-TACCGTGCCCAGCAGACCAATATCCGCAACACTTACCTATGTACTATTGTACATCTACTTATTTACCACTAGCATATGACCAGTAGTACTGCTGATTAATCTGACCTAAAA-CATAAAA--TTATTGG-TTTTACATAAACTGTTTAAACTACATGACTATTATACAGGTAATAAGAATGAAATGGTATAGG--ACATAAT…	PB_BRAEi9
Sequence 10 Paraíba (PB_BRA)	----------------GCATTGGTCTTGTAAA-CCAAAGA-TGAAAA------CTAT---AACT--TTCCTAGAATAA--CAAAAGAGAAGGACTCAAAC-CTTCATCCCC-GGCCCCCCAAAACCGGAATC-TTTTAATTAAACTATCCCTT-GACGCAGAATAAGCGCC-AACACATAAACTTACCTATATCCTC-TACCGTGCCCAGCAGACCAATATCCGCAACACTTACCTATGTACTATTGTACATCTACTTATTTACCACTAGCATATGACCAGTAGTACTGCTGATTAATCTGACCTAAAA-CATAAAA--TTATTGG-TTTTACATAAACTGTTTAAACTACATGACTATTATACAGGTAATAAGAATGAAATGGTATAGG--ACATAAT…	PB_BRAEi10
Sequence 11 Paraíba (PB_BRA)	-----------CCTAAGCATTGGTCTTGTAAA-CCAAAGATTGAAAA------CTAT---AACT--TTCCTAGAAT-A-TCAAAAGAGAAGGACTCAAAC-CTTCATCCCCGG--CCCCCAAAACCGGAATC-TTTTAATTAAACTATCCCTT-GACGCAGAATAAGC-GCCAACACATAAACTTACCTATATCCTC-TACCGTGCCCAGCAGACCAATATCCGCAACACTTACCTATGTACTATTGTACATCTACTTATTTACCACTAGCATATGACCAGTAGTACTGCTGATTAATCTGACCTAAAA-CATAAAA--TTATTGG-TTTTACATAAACTGTTTAAACTACATGACTATTATACAGGTAATAAGAATGAAATGGTATAGG--ACATAAT…	PB_BRAEi11
Sequence 12 Paraíba (PB_BRA)	---------------------TCTAGTAA-TC-C-AAGAC-GAAAAC------T-TA---ACTT--TCGTAGAA-A-T--AAAAGAGAAAG-ACTCAAACC-TTCATCCCCGG-CCCCCCAAAACCGGAATC-TTTTAATTAAACTATCCCTT-GACGCAGAATAAGC-GCCAACACATAAACTTACCTATATCCTC-TACCGTGCCCAGCAGACCAATATCCGCAACACTTACCTATGTACTATTGTACATCTACTTATTTACCACTAGCATATGACCAGTAGTACTGCTGATTAATCTGACCTAAAA-CATAAAA--TTATTGG-TTTTACATAAACTGTTTAAACTACATGACTATTATACAGGTAATAAGAATGAAATGGTATAGG--ACATAAT…	PB_BRAEi12
Sequence 13 Paraíba (PB_BRA)	-------------------------------------------------------------------------------GACAAAGAGAAGGACTCAAACCTT-CATCCCCGG--CCCCCAAAACCGGAATC-TTTTAATTAAACTATCCC-TTGACGCAGAAT-AAGC-GCC-AACACATAAACTTACCTATATCCTC-TACCGTGCCCAGCAGACCAATATCCGCAACACTTACCTATGTACTATTGTACATCTACTTATTTACCACTAGCATATGACCAGTAGTACTGCTGATTAATCTGACCTAAAA-CATAAAA--TTATTGG-TTTTACATAAACTGTTTAAACTACATGACTATTATACAGGTAATAAGAATGAAATGGTATAGG--ACATA…	PB_BRAEi13
Sequence 14 Paraíba (PB_BRA)	----------------GCATTGGTCTTGTAAA-CCAAAGATTGAAAA------CTAT---AACT--TTCCTAGAATAA-TCAAAAGAGAAGGACTCAAAC-CTTCATCCCCGG-CCCCCCAAAACCGGAATC-TTTTAATTAAACTATCCCTT-GACGCAGAATAAGC-GCCAACACATAAACTTACCTATATCCTC-TACCGTGCCCAGCAGACCAATATCCGCAACACTTACCTATGTACTATTGTACATCTACTTATTTACCACTAGCATATGACCAGTAGTACTGCTGATTAATCTGACCTAAAA-CATAAAA--TTATTGG-TTTTACATAAACTGTTTAAACTACATGACTATTATACAGGTAATAAGAATGAAATGGTATAGG--ACATAAT…	PB_BRAEi14
Sequence 15 Paraíba (PB_BRA)	----------------GCATTGGTCTTGTAAA-CCAAAGATTGAAAA------CTAT---AACT--TTCCTAGAATAA-TCAAAAGAGAAGGACTCAAAC-CTTCATCCCCGG--CCCCCAAAACCGGAATC-TTTTAATTAAACTATCCCTT-GACGCAGAATAAGC-GCCAACACATAAACTTACCTATATCCTC-TACCGTGCCCAGCAGACCAATATCCGCAACACTTACCTATGTACTATTGTACATCTACTTATTTACCACTAGCATATGACCAGTAGTACTGCTGATTAATCTGACCTAAAA-CATAAAA--TTATTGG-TTTTACATAAACTGTTTAAACTACATGACTATTATACAGGTAATAAGAATGAAATGGTATAGG--ACATAAT…	PB_BRAEi15
Sequence 16 Paraíba (PB_BRA)	----TTAACCCCTAAAGCATTGGTCTT-TAAAACCAAAGA-TGAAAAA-----CTAT---AACT--TTCCTAGAATAA-CAAAAGAGAA-G-ACTCAAAC-CTTCATCCCCCGGCCCCCCAAAACCGGAATC-TTTTAATTAAACTATCCCTT-GACGCAGAATAAGC-GCCAACACATAAACTTACCTATATCCTC-TACCGTGCCCAGCAGACCAATATCCGCAACACTTACCTATGTACTATTGTACATCTACTTATTTACCACTAGCATATGACCAGTAGTACTGCTGATTAATCTGACCTAAAA-CATAAAA--TTATTGG-TTTTACATAAACTGTTTAAACTACATGACTATTATACAGGTAATAAGAATGAAATGGTATAGG--ACATAAT…	PB_BRAEi16
Sequence 17 Paraíba (PB_BRA)	----------------------------AAGGACTCAAAC-CTTCATCCCCGG--CCCCCAAAACCGGAATC-TTTTAATTAAACTATCCCTT-GACGCAGAATAAGC-GCCAACACATAAACTTACCTATATCCTC-TACCGTGCCCAGCAGACCAATATCCGCAACACTTACCTATGTACTATTGTACATCTACTTATTTACCACTAGCATATGACCAGTAGTACTGCTGATTAATCTGACCTAAAA-CATAAAA--TTATTGG-TTTTACATAAACTGTTTAAACTACATGACTATTATACAGGTAATAAGAATGAAATGGTATAGG--ACATAATATTAAGTAATTATTCTCAAACATGAATATCGTCACAGTAATGGGTTATTTCTTAGTTCAG…	PB_BRAEi17
Sequence 18 Paraíba (PB_BRA)	--------------------TGGTCTTGTAAA-CCAAAGATTGAAAA------CTAT---AACT--TTCCTAGAATAA-TCAAAAGAGAAGGACTCAAAC-CTTCATCCCCGG-CCCCCCAAAACCGGAATC-TTTTAATTAAACTATCCCTT-GACGCAGAATAAGC-GCCAACACATAAACTTACCTATATCCTC-TACCGTGCCCAGCAGACCAATATCCGCAACACTTACCTATGTACTATTGTACATCTACTTATTTACCACTAGCATATGACCAGTAGTACTGCTGATTAATCTGACCTAAAA-CATAAAA--TTATTGG-TTTTACATAAACTGTTTAAACTACATGACTATTATACAGGTAATAAGAATGAAATGGTATAGG--ACATAAT…	PB_BRAEi18
Sequence 19 Paraíba (PB_BRA)	--------------------------------------------------------------------------------CAAAAGAGAAGGACTCAAACCTT-CATCCCCGG--CCCCCAAAACCGGAATC-TTTTAATTAAACTATCCC-TTGACGCAGAAT-AAGC-GCC-AACACATAAACTTACCTATATCCTC-TACCGTGCCCAGCAGACCAATATCCGCAACACTTACCTATGTACTATTGTACATCTACTTATTTACCACTAGCATATGACCAGTAGTACTGCTGATTAATCTGACCTAAAA-CATAAAA--TTATTGG-TTTTACATAAACTGTTTAAACTACATGACTATTATACAGGTAATAAGAATGAAATGGTATAGG--ACATA…	PB_BRAEi19
Sequence 20 Paraíba (PB_BRA)	--------------------------------------------------------------------------------CAAAAGAGAAGGACTCAAACCTT-CATCCCCGG--CCCCCAAAACCGGAATC-TTTTAATTAAACTATCCC-TTGACGCAGAAT-AAGC-GCC-AACACATAAACTTACCTATATCCTC-TACCGTGCCCAGCAGACCAATATCCGCAACACTTACCTATGTACTATTGTACATCTACTTATTTACCACTAGCATATGACCAGTAGTACTGCTGATTAATCTGACCTAAAA-CATAAAA--TTATTGG-TTTTACATAAACTGTTTAAACTACATGACTATTATACAGGTAATAAGAATGAAATGGTATAGG--ACATA…	PB_BRAEi20
Sequence 21Paraíba (PB_BRA)	--------------------------------------------------------------------------------CCAAAGAGAAGGACTCAAACCTT-CATCCCCGG--CCCCCAAAACCGGAATC-TTTTAATTAAACTATCCC-TTGACGCAGAAT-AAGC-GCC-AACACATAAACTTACCTATATCCTC-TACCGTGCCCAGCAGACCAATATCCGCAACACTTACCTATGTACTATTGTACATCTACTTATTTACCACTAGCATATGACCAGTAGTACTGCTGATTAATCTGACCTAAAA-CATAAAA--TTATTGG-TTTTACATAAACTGTTTAAACTACATGACTATTATACAGGTAATAAGAATGAAATGGTATAGG--ACATA…	PB_BRAEi21
Sequence 22 Paraíba (PB_BRA)	---------------------------------------------------------------------------------CAAAGAGAAGGACTCAAACCTT-CATCCCCGG--CCCCCAAAACCGGAATC-TTTTAATTAAACTATCCC-TTGACGCAGAAT-AAGC-GCC-AACACATAAACTTACCTATATCCTC-TACCGTGCCCAGCAGACCAATATCCGCAACACTTACCTATGTACTATTGTACATCTACTTATTTACCACTAGCATATGACCAGTAGTACTGCTGATTAATCTGACCTAAAA-CATAAAA--TTATTGG-TTTTACATAAACTGTTTAAACTACATGACTATTATACAGGTAATAAGAATGAAATGGTATAGG--ACATA…	PB_BRAEi22
Sequence 23 Paraíba (PB_BRA)	------------------ATTGGTCTTGTAAA-CCAAAGATTGAAAA------CTAT---AACT--TTCCTAGAATAA-TCAAAAGAGAAGGACTCA-AACCTTCATCCCC-G-GCCCCCAAAACCGGAATC-TTTTAATTAAACTATCCCTT-GACGCAGAATAAGC-GCCAACACATAAACTTACCTATATCCTC-TACCGTGCCCAGCAGACCAATATCCGCAACACTTACCTATGTACTATTGTACATCTACTTATTTACCACTAGCATATGACCAGTAGTACTGCTGATTAATCTGACCTAAAA-CATAAAA--TTATTGG-TTTTACATAAACTGTTTAAACTACATGACTATTATACAGGTAATAAGAATGAAATGGTATAGG--ACATAAT…	PB_BRAEi23
Sequence 24 Paraíba (PB_BRA)	---------------------GGTCTTGTAAA-CCAAAGATTGAAAAA-----CTAT---AACT--TTCCTAGAATAA-TCAAAAGAGAAGGACTCA-AACCTTCATCCCCCG-GCCCCCAAAACCGGAATC-TTTTAATTAAACTATCCCTT-GACGCAGAATAAGC-GCCAACACATAAACTTACCTATATCCTC-TACCGTGCCCAGCAGACCAATATCCGCAACACTTACCTATGTACTATTGTACATCTACTTATTTACCACTAGCATATGACCAGTAGTACTGCTGATTAATCTGACCTAAAA-CATAAAA--TTATTGG-TTTTACATAAACTGTTTAAACTACATGACTATTATACAGGTAATAAGAATGAAATGGTATAGG--ACATAAT…	PB_BRAEi24
Sequence 25 Paraíba (PB_BRA)	-------------TAAGCATTGGTCTTGTAAA-CCAAAGATTGAAAA------CTAT---AACT--TTCCTAGAATAA-TCAAAAGAGAAGGACTCA-AACCTTCATCCCC-G-GCCCCCAAAACCGGAATC-TTTTAATTAAACTATCCCTT-GACGCAGAATAAGC-GCCAACACATAAACTTACCTATATCCTC-TACCGTGCCCAGCAGACCAATATCCGCAACACTTACCTATGTACTATTGTACATCTACTTATTTACCACTAGCATATGACCAGTAGTACTGCTGATTAATCTGACCTAAAA-CATAAAA--TTATTGG-TTTTACATAAACTGTTTAAACTACATGACTATTATACAGGTAATAAGAATGAAATGGTATAGG--ACATAAT…	PB_BRAEi25
Sequence 26 Paraíba (PB_BRA)	-----------------CATTGGTCTTGTAAA-CCAAAGATTGAAAA------CTAT---AACT--TTCCTAGAATAA-TCAAAAGAGAAGGACTCA-AACCTTCATCCCC-G-GCCCCCAAAACCGGAATC-TTTTAATTAAACTATCCCTT-GACGCAGAATAAGC-GCCAACACATAAACTTACCTATATCCTC-TACCGTGCCCAGCAGACCAATATCCGCAACACTTACCTATGTACTATTGTACATCTACTTATTTACCACTAGCATATGACCAGTAGTACTGCTGATTAATCTGACCTAAAA-CATAAAA--TTATTGG-TTTTACATAAACTGTTTAAACTACATGACTATTATACAGGTAATAAGAATGAAATGGTATAGG--ACATAAT…	PB_BRAEi26
Sequence 27 Paraíba (PB_BRA)	---------------------------GTAAA-CCAAAGATTGAAAA------CTAT---AACT--TTCCTAGAATAA-TCAAAAGAGAAGGACTCAAAC-CTTCATCCCCGG-CCCCCCAAAACCGGAATC-TTTTAATTAAACTATCCCTT-GACGCAGAATAAGC-GCCAACACATAAACTTACCTATATCCTC-TACCGTGCCCAGCAGACCAATATCCGCAACACTTACCTATGTACTATTGTACATCTACTTATTTACCACTAGCATATGACCAGTAGTACTGCTGATTAATCTGACCTAAAA-CATAAAA--TTATTGG-TTTTACATAAACTGTTTAAACTACATGACTATTATACAGGTAATAAGAATGAAATGGTATAGG--ACATAAT…	PB_BRAEi27
Sequence 1 Pernambuco (PE_BRA)	--------CCCC-CTAGCATTGGTCTTGTAAA-CCAAAGATTGAAAA------CTAT---AACT--TTCCTAGAATAA-TCAAAAGAGAAGGACTCAAAC-CTTCATCCCC--GGCCCCCAAAACCGGAATC-TTTTAATTAAACTATCCCTT-GACGCAGAATAAGC-GCCAACACATAAACTTACCTATATCCTC-TACCGTGCCCAGCAGACCAATATCCGCAACACTTACCTATGTACTATTGTACATCTACTTATTTACCACTAGCATATGACCAGTAGTACTGCTGATTAATCTGACCTAAAA-CATAAAA--TTATTGG-TTTTACATAAACTGTTTAAACTACATGACTATTATACAGGTAATAAGAATGAAATGGTATAGG--ACATAAT…	PE_BRAEi1
Sequence 2 Pernambuco (PE_BRA)	--------------TAGCATTGGTCTTGTAAA-CCAAAGATTGAAAA------CTAT---AACT--TTCCTAGAATAA-TCAAAAGAGAAGGACTCAAAC-CTTCATCCCC-GGCCCCCCAAAACCGGAATC-TTTTAATTAAACTATCCCTT-GACGCAGAATAAGCGCC-AACACATAAACTTACCTATATCCTC-TACCGTGCCCAGCAGACCAATATCCGCAACACTTACCTATGTACTATTGTACATCTACTTATTTACCACTAGCATATGACCAGTAGTACTGCTGATTAATCTGACCTAAAA-CATAAAA--TTATTGG-TTTTACATAAACTGTTTAAACTACATGACTATTATACAGGTAATAAGAATGAAATGGTATAGG--ACATAAT…	PE_BRAEi2
Sequence 3 Pernambuco (PE_BRA)	----------------GCATTGGTCTTGTAAA-CCAAAGATTGAAAA------CTAT---AACT--TTCCTAGAATAA-TCAAAAGAGAAGGACTCAAAC-CTTCATCCCCGG--CCCCCAAAACCGGAATC-TTTTAATTAAACTATCCCCTTGACGCAGAATAAGC-GCCAACACATAAACTTACCTATATCCTC-TACCGTGCCCAGCAGACCAATATCCGCAACACTTACCTATGTACTATTGTACATCTACTTATTTACCACTAGCATATGACCAGTAGTACTGCTGATTAATCTGACCTAAAA-CATAAAA--TTATTGG-TTTTACATAAACTGTTTAAACTACATGACTATTATACAGGTAATAAGAATGAAATGGTATAGG--ACATAAT…	PE_BRAEi3
Sequence 4 Pernambuco (PE_BRA)	------------------ATTGGTCTTGTAAA-CCAAAGATTGAAAA------CTAT---AACT--TTCCTAGAATAA-TCAAAAGAGAAGGACTCA-AACCTTCATCCCC-G-GCCCCCAAAACCGGAATC-TTTTAATTAAACTATCCCTT-GACGCAGAATAAGC-GCCAACACATAAACTTACCTATATCCTC-TACCGTGCCCAGCAGACCAATATCCGCAACACTTACCTATGTACTATTGTACATCTACTTATTTACCACTAGCATATGACCAGTAGTACTGCTGATTAATCTGACCTAAAA-CATAAAA--TTATTGG-TTTTACATAAACTGTTTAAACTACATGACTATTATACAGGTAATAAGAATGAAATGGTATAGG--ACATAAT…	PE_BRAEi4
Sequence 5 Pernambuco (PE_BRA)	---------------AGCATTGGTCTTGTAAA-CCAAAGATTGAAAA------CTAT---AACT--TTCCTAGAATAA-TCAAAAGAGAAGGACTCA-AACCTTCATCCCC-G-GCCCCCAAAACCGGAATC-TTTTAATTAAACTATCCCTT-GACGCAGAATAAGC-GCCAACACATAAACTTACCTATATCCTC-TACCGTGCCCAGCAGACCAATATCCGCAACACTTACCTATGTACTATTGTACATCTACTTATTTACCACTAGCATATGACCAGTAGTACTGCTGATTAATCTGACCTAAAA-CATAAAA--TTATTGG-TTTTACATAAACTGTTTAAACTACATGACTATTATACAGGTAATAAGAATGAAATGGTATAGG--ACATAAT…	PE_BRAEi5
Sequence 6 Pernambuco (PE_BRA)	---------------AGCATTGGTCTTGTAAA-CCAAAGATTGAAAA------CTAT---AACT--TTCCTAGAATAA-TCAAAAGAGAAGGACTCA-AACCTTCATCCCC-G-GCCCCCAAAACCGGAATC-TTTTAATTAAACTATCCCTT-GACGCAGAATAAGC-GCCAACACATAAACTTACCTATATCCTC-TACCGTGCCCAGCAGACCAATATCCGCAACACTTACCTATGTACTATTGTACATCTACTTATTTACCACTAGCATATGACCAGTAGTACTGCTGATTAATCTGACCTAAAA-CATAAAA--TTATTGG-TTTTACATAAACTGTTTAAACTACATGACTATTATACAGGTAATAAGAATGAAATGGTATAGG--ACATAAT…	PE_BRAEi6
Sequence 7 Pernambuco (PE_BRA)	-GCTTAACCCC-TAA-GCATTGGTCTTGTAAA-CCAAAGATTGAAAA------CTAT---AACT--TTCCTAGAATAA-TCAAAAGAGAAGGACTCAAAC-CTTCATCCCC--GGCCCCCAAAACCGGAATC-TTTTAATTAAACTATCCCTT-GACGCAGAATAAGC-GCCAACACATAAACTTACCTATATCCTC-TACCGTGCCCAGCAGACCAATATCCGCAACACTTACCTATGTACTATTGTACATCTACTTATTTACCACTAGCATATGACCAGTAGTACTGCTGATTAATCTGACCTAAAA-CATAAAA--TTATTGG-TTTTACATAAACTGTTTAAACTACATGACTATTATACAGGTAATAAGAATGAAATGGTATAGG--ACATAAT…	PE_BRAEi7
Sequence 8 Pernambuco (PE_BRA)	-------------------TTGGTCTTGTAAA-CCAAAGATTGAAAA------CTAT---AACT--TTCCTAGAATAA-TCAAAAGAGAAGGACTCA-AACCTTCATCCCC-G-GCCCCCAAAACCGGAATC-TTTTAATTAAACTATCCCTT-GACGCAGAATAAGC-GCCAACACATAAACTTACCTATATCCTC-TACCGTGCCCAGCAGACCAATATCCGCAACACTTACCTATGTACTATTGTACATCTACTTATTTACCACTAGCATATGACCAGTAGTACTGCTGATTAATCTGACCTAAAA-CATAAAA--TTATTGG-TTTTACATAAACTGTTTAAACTACATGACTATTATACAGGTAATAAGAATGAAATGGTATAGG--ACATAAT…	PE_BRAEi8
Sequence 9 Pernambuco (PE_BRA)	-----------------CATTGGTCTTGTAAA-CCAAAGATTGAAAA------CTAT---AACT--TTCCTAGAATAA-TCAAAAGAGAAGGACTCA-AACCTTCATCCCCGG-CCCCCCAAAACCGGAATC-TTTTAATTAAACTATCCCTT-GACGCAGAATAAGC-GCCAACACATAAACTTACCTATATCCTC-TACCGTGCCCAGCAGACCAATATCCGCAACACTTACCTATGTACTATTGTACATCTACTTATTTACCACTAGCATATGACCAGTAGTACTGCTGATTAATCTGACCTAAAA-CATAAAA--TTATTGG-TTTTACATAAACTGTTTAAACTACATGACTATTATACAGGTAATAAGAATGAAATGGTATAGG--ACATAAT…	PE_BRAEi9
Sequence 10 Pernambuco (PE_BRA)	-------------------TAAGCATTGGTCT-GTAAACCAAGATGAA-----AACT---ATAC--TTTCTAGAATAA-TCAAAAGAGAAGGACTCAAAC-CTTCATCCCCGG--CCCCCAAAACCGGAATC-TTTTAATTAAACTATCCCTT-GACGCAGAATAAGC-GCCAACACATAAACTTACCTATATCCTC-TACCGTGCCCAGCAGACCAATATCCGCAACACTTACCTATGTACTATTGTACATCTACTTATTTACCACTAGCATATGACCAGTAGTACTGCTGATTAATCTGACCTAAAA-CATAAAA--TTATTGG-TTTTACATAAACTGTTTAAACTACATGACTATTATACAGGTAATAAGAATGAAATGGTATAGCGCACATAAT…	PE_BRAEi10
Sequence 11 Pernambuco (PE_BRA)	----------------GCATTGGTCTTGTAAA-CCAAAGATTGAAAA------CTAT---AACT--TTCCTAGAATAA-TCAAAAGAGAAGGACTCAAAC-CTTCATCCCCGG-CCCCC-AAAACCGGAATC-TTTTAATTAAACTATCCCTT-GACGCAGAATAAGC-GCCAACACATAAACTTACCTATATCCTC-TACCGTGCCCAGCAGACCAATATCCGCAACACTTACCTATGTACTATTGTACATCTACTTATTTACCACTAGCATATGACCAGTAGTACTGCTGATTAATCTGACCTAAAA-CATAAAA--TTATTGG-TTTTACATAAACTGTTTAAACTACATGACTATTATACAGGTAATAAGAATGAAATGGTATAGG--ACATAAT…	PE_BRAEi11
Sequence 12 Pernambuco (PE_BRA)	--------------AAGCATTGGTCTTGTAAA-CCAAAGATTGAAAA------CTAT---AACT--TTCCTAGAATAA-TCAAAAGAGAAGGACTCAAAC-CTTCATCCCCGG--CCCCCAAAACCGGAATC-TTTTAATTAAACTATCCCTT-GACGCAGAATAAGC-GCCAACACATAAACTTACCTATATCCTC-TACCGTGCCCAGCAGACCAATATCCGCAACACTTACCTATGTACTATTGTACATCTACTTATTTACCACTAGCATATGACCAGTAGTACTGCTGATTAATCTGACCTAAAA-CATAAAA--TTATTGG-TTTTACATAAACTGTTTAAACTACATGACTATTATACAGGTAATAAGAATGAAATGGTATAGG--ACATAAT…	PE_BRAEi12
Sequence 13 Pernambuco (PE_BRA)	-----------------CATTGGTCTTGTAAA-CCAAAGATTGAAAA------CTAT---AACT--TTCCTAGAATAA-TCAAAAGAGAAGGACTCA-AACCTTCATCCCC-G-GCCCCCAAAACCGGAATC-TTTTAATTAAACTATCCCTT-GACGCAGAATAAGC-GCCAACACATAAACTTACCTATATCCTC-TACCGTGCCCAGCAGACCAATATCCGCAACACTTACCTATGTACTATTGTACATCTACTTATTTACCACTAGCATATGACCAGTAGTACTGCTGATTAATCTGACCTAAAA-CATAAAA--TTATTGG-TTTTACATAAACTGTTTAAACTACATGACTATTATACAGGTAATAAGAATGAAATGGTATAGG--ACATAAT…	PE_BRAEi13
Sequence 1 Bahia (BA_BRA)	-----------------CATTGGTCTTGTAAA-CCAAAGATTGAAAA------CTAT---AACT--TTCCTAGAATAA-TCAAAAGAGAAGGACTCA-AACCTTCATCCCC-G-GCCCCCAAAACCGGAATC-TTTTAATTAAACTATCCCTT-GACGCAGAATAAGC-GCCAACACATAAACTTACCTATATCCTC-TACCGTGCCCAGCAGACCAATATCCGCAACACTTACCTATGTACTATTGTACATCTACTTATTTACCACTAGCATATGACCAGTAGTACTGCTGATTAATCTGACCTAAAA-CATAAAA--TTATTGG-TTTTACATAAACTGTTTAAACTACATGACTATTATACAGGTAATAAGAATGAAATGGTATAGG--ACATAAT…	BA_BRAEi1
Sequence 2 Bahia (BA_BRA)	--------ACCCTAAAGCATTGGTCTT-TAAA-CCAAAGATTGAAAA------CTAT---AACT--TTCCTAGAATAA-TCAAAAGAGAAGGACTCAAAC-CTTCATCCCCGG--CCCCCAAAACCGGAATC-TTTTAATTAAACTATCCCTT-GACGCAGAATAAGC-GCCAACACATAAACTTACCTATATCCTC-TACCGTGCCCAGCAGACCAATATCCGCAACACTTACCTATGTACTATTGTACATCTACTTATTTACCACTAGCATATGACCAGTAGTACTGCTGATTAATCTGACCTAAAA-CATAAAA--TTATTGG-TTTTACATAAACTGTTTAAACTACATGACTATTATACAGGTAATAAGAATGAAATGGTATAGG--ACATAAT…	BA_BRAEi2
Sequence 3 Bahia (BA_BRA)	------------------T-GGTCT-GTAAA--CCAAAGA-TGAAAA------CTAT---AACT--TTCCTAGAATAA-TCAAAAGAGAAGGACTCAAACCTT-CATCCCCGG-CCCCC-AAAACCGGAATC-TTTTAATTAAACTATCCCTT-GACGCAGAATAAGC-GCCAACACATAAACTTACCTATATCCTC-TACCGTGCCCAGCAGACCAATATCCGCAACACTTACCTATGTACTATTGTACATCTACTTATTTACCACTAGCATATGACCAGTAGTACTGCTGATTAATCTGACCTAAAA-CATAAAA--TTATTGG-TTTTACATAAACTGTTTAAACTACATGACTATTATACAGGTAATAAGAATGAAATGGTATAGG--ACATAAT…	BA_BRAEi3
Sequence 4 Bahia (BA_BRA)	-----------------CATTGGTCTTGTAAA-CCAAAGATTGAAAA------CTAT---AACT--TTCCTAGAATAA-TCAAAAGAGAAGGACTCAAAC-CTTCATCCCCGG-CCCCC-AAAACCGGAATC-TTTTAATTAAACTATCCCTT-GACGCAGAATAAGC-GCCAACACATAAACTTACCTATATCCTC-TACCGTGCCCAGCAGACCAATATCCGCAACACTTACCTATGTACTATTGTACATCTACTTATTTACCACTAGCATATGACCAGTAGTACTGCTGATTAATCTGACCTAAAA-CATAAAA--TTATTGG-TTTTACATAAACTGTTTAAACTACATGACTATTATACAGGTAATAAGAATGAAATGGTATAGG--ACATAAT…	BA_BRAEi4
Sequence 1 Alagoas (Al_BRA)	-----------------------TCTTGTAAA-CCAAAGATTGAAAA------CTAT---AACT--TTCCTAGAATAA-TCAAAAGAGAAGGACTCAAAC-CTTCATCCCCGG-CCCCC-AAAACCGGAATC-TTTTAATTAAACTATCCCTT-GACGCAGAATAAGC-GCCAACACATAAACTTACCTATATCCTC-TACCGTGCCCAGCAGACCAATATCCGCAACACTTACCTATGTACTATTGTACATCTACTTATTTACCACTAGCATATGACCAGTAGTACTGCTGATTAATCTGACCTAAAA-CATAAAA--TTATTGG-TTTTACATAAACTGTTTAAACTACATGACTATTATACAGGTAATAAGAATGAAATGGTATAGG--ACATAAT…	Al_BRAEi1
Sequence 2 Alagoas (Al_BRA)	--------------------GGTCTTGTAAA--CCAAAGATTGAAAA------CTAT---AACT--TTCCTAGAATAA-TCAAAAGAGAAGGACTCAAACCTT-CATCCCCGG-CCCCCCAAAACCGGAATC-TTTTAATTAAACTATCCCTT-GACGCAGAATAAGC-GCCAACACATAAACTTACCTATATCCTC-TACCGTGCCCAGCAGACCAATATCCGCAACACTTACCTATGTACTATTGTACATCTACTTATTTACCACTAGCATATGACCAGTAGTACTGCTGATTAATCTGACCTAAAA-CATAAAA--TTATTGG-TTTTACATAAACTGTTTAAACTACATGACTATTATACAGGTAATAAGAATGAAATGGTATAGG--ACATAAT…	Al_BRAEi2
Sequence 3 Alagoas (Al_BRA)	------------------TTGGTCTTG-AAA--CCAAAGATTGAAAA------CTAT---AACT--TTCCTAGAATAA-TCAAAAGAGAAGGACTCAAACCTT-CATCCCCGG-CCCCC-AAAACCGGAATC-TTTTAATTAAACTATCCCTT-GACGCAGAATAAGC-GCCAACACATAAACTTACCTATATCCTC-TACCGTGCCCAGCAGACCAATATCCGCAACACTTACCTATGTACTATTGTACATCTACTTATTTACCACTAGCATATGACCAGTAGTACTGCTGATTAATCTGACCTAAAA-CATAAAA--TTATTGG-TTTTACATAAACTGTTTAAACTACATGACTATTATACAGGTAATAAGAATGAAATGGTATAGG--ACATAAT…	Al_BRAEi3
Sequence 4 Alagoas (Al_BRA)	----------------------------------------CAAAATA------TGTG---CGGG--TCATATTAGC---GACAAAGAGAAGGACTCAAAC-CTTCATCCCCGG--CCCCCAAAACCGGAATC-TTTTAATTAAACTATCCCTT-GACGCAGAATAAGC-GCCAACACATAAACTTACCTATATCCTC-TACCGTGCCCAGCAGACCAATATCCGCAACACTTACCTATGTACTATTGTACATCTACTTATTTACCACTAGCATATGACCAGTAGTACTGCTGATTAATCTGACCTAAAA-CATAAAA--TTATTGG-TTTTACATAAACTGTTTAAACTACATGACTATTATACAGGTAATAAGAATGAAATGGTATAGG--ACATAAT…	Al_BRAEi4
Sequence 5 Alagoas (Al_BRA)	---------------------------------------------------------------------------------------------------TTTA-CATCCCCGG--CCCCCAAAACCGGAATC-TTTTAATTAAACTATCCC-TTGACGCAGAAT-AAGC-GCC-AACACATAAACTTACCTATATCCTC-TACCGTGCCCAGCAGACCAATATCCGCAACACTTACCTATGTACTATTGTACATCTACTTATTTACCACTAGCATATGACCAGTAGTACTGCTGATTAATCTGACCTAAAA-CATAAAA--TTATTGG-TTTTACATAAACTGTTTAAACTACATGACTATTATACAGGTAATAAGAATGAAATGGTATAGG--ACATA…	Al_BRAEi5
Sequence 6 Alagoas (Al_BRA)	---------------AGCATTGGTCTTGTAAA-CCAAAGATTGAAAA------CTAT---AACT--TTCCTAGAATAA-TCAAAAGAGAAGGACTCAAACC-TTCATCCCCGG--CCCCCAAAACCGGAATC-TTTTAATTAAACTATCCCTT-GACGCAGAATAAGC-GCCAACACATAAACTTACCTATATCCTC-TACCGTGCCCAGCAGACCAATATCCGCAACACTTACCTATGTACTATTGTACATCTACTTATTTACCACTAGCATATGACCAGTAGTACTGCTGATTAATCTGACCTAAAA-CATAAAA--TTATTGG-TTTTACATAAACTGTTTAAACTACATGACTATTATACAGGTAATAAGAATGAAATGGTATAGG--ACATAAT…	Al_BRAEi6
Sequence 7 Alagoas (Al_BRA)	---------------AGCATTGGTCTTGTAAA--CAAA-A-TGAAGAAGCAGG-TATGGG--CTGAT-CCTA--ATAAGTCA--AGAGRAGGACTCARACCTT-CATCCCCGG--CCCCCAAAACCGGAATC-TTTTAATTAAACTATCCC-TTGACGCAGAAT-AAGC-GCC-AACACATAAACTTACCTATATCCTC-TACCGTGCCCAGCAGACCAATATCCGCAACACTTACCTATGTACTATTGTACATCTACTTATTTACCACTAGCATATGACCAGTAGTACTGCTGATTAATCTGACCTAAAA-CATAAAA--TTATTGG-TTTTACATAAACTGTTTAAACTACATGACTATTATACAGGTAATAAGAATGAAATGGTATAGG--ACATA…	Al_BRAEi7
Sequence 8 Alagoas (Al_BRA)	----------------GCATTGGTCTTGTAAA-CCAAAGATTGAAAA------CTAT---AACT--TTCCTAGAATAA-TCAAAAGAGAAGGACTCAAACC-TTCATCCCCGG--CCCCCAAAACCGGAATC-TTTTAATTAAACTATCCCTT-GACGCAGAATAAGC-GCCAACACATAAACTTACCTATATCCTC-TACCGTGCCCAGCAGACCAATATCCGCAACACTTACCTATGTACTATTGTACATCTACTTATTTACCACTAGCATATGACCAGTAGTACTGCTGATTAATCTGACCTAAAA-CATAAAA--TTATTGG-TTTTACATAAACTGTTTAAACTACATGACTATTATACAGGTAATAAGAATGAAATGGTATAGG--ACATAAT…	Al_BRAEi8
Sequence 9 Alagoas (Al_BRA)	----------------GCATTGGTCTTGTAAA-CCAAAGATTGAAAA------CTAT---AACT--TTCCTAGAATAA-TCAAAAGAGAAGGACTCAAACC-TTCATCCCCGG--CCCCCAAAACCGGAATC-TTTTAATTAAACTATCCCTT-GACGCAGAATAAGC-GCCAACACATAAACTTACCTATATCCTC-TACCGTGCCCAGCAGACCAATATCCGCAACACTTACCTATGTACTATTGTACATCTACTTATTTACCACTAGCATATGACCAGTAGTACTGCTGATTAATCTGACCTAAAA-CATAAAA--TTATTGG-TTTTACATAAACTGTTTAAACTACATGACTATTATACAGGTAATAAGAATGAAATGGTATAGG--ACATAAT…	Al_BRAEi9
Sequence 10 Alagoas (Al_BRA)	--------------------------------------------CTA------TGCG---CGTG--CGCTCCATCCGA-GACAAGGAGAAGGACTCAAAC-CTTCATCCCCGG--CCCCCAAAACCGGAATC-TTTTAATTAAACTATCCCTT-GACGCAGAATAAGC-GCCAACACATAAACTTACCTATATCCTC-TACCGTGCCCAGCAGACCAATATCCGCAACACTTACCTATGTACTATTGTACATCTACTTATTTACCACTAGCATATGACCAGTAGTACTGCTGATTAATCTGACCTAAAA-CATAGAA--TTATTGG-TTTTACATAAACTGTTTAAACTACATGACTATTATACAGGTAATAAGAATGAAATGGTATAGG--ACATAAT…	Al_BRAEi10
Sequence 11 Alagoas (Al_BRA)	-GCTTAAACCCCTAAAGCATTGGTCTTGTAAA-CCAAAGATTGAAAA------CTAT---AACT--TTCCTAGAATAA-TCAAAAGAGAAGGACTCAAAC-CTTCATCCCC--GGCCCCCAAAACCGGAATC-TTTTAATTAAACTATCCCTT-GACGCAGAATAAGC-GCCAACACATAAACTTACCTATATCCTC-TACCGTGCCCAGCAGACCAATATCCGCAACACTTACCTATGTACTATTGTACATCTACTTATTTACCACTAGCATATGACCAGTAGTACTGCTGATTAATCTGACCTAAAA-CATAAAA--TTATTGG-TTTTACATAAACTGTTTAAACTACATGACTATTATACAGGTAATAAGAATGAAATGGTATAGG--ACATAAT…	Al_BRAEi11
Sequence 1 Rio Grande do Norte (RN_BRA)	------------------ATTGGTCTTGTAAA-CCAAAGATTGAAAA------CTAT---AACT--TTCCTAGAATAA-TCAAAAGAGAAGGACTCAAACC-TTCATCCCCGG--CCCCCAAAACCGGAATC-TTTTAATTAAACTATCCCTT-GACGCAGAATAAGC-GCCAACACATAAACTTACCTATATCCTC-TACCGTGCCCAGCAGACCAATATCCGCAACACTTACCTATGTACTATTGTACATCTACTTATTTACCACTAGCATATGACCAGTAGTACTGCTGATTAATCTGACCTAAAA-CATAAAA--TTATTGG-TTTTACATAAACTGTTTAAACTACATGACTATTATACAGGTAATAAGAATGAAATGGTATAGG--ACATAAT…	RN_BRAEi1
Sequence 2 Rio Grande do Norte (RN_BRA)	------------------ATTGGTCTTGTAAA-CCAAAGATTGAAAA------CTAT---AACT--TTCCTAGAATAA-TCAAAAGAGAAGGACTCAAACC-TTCATCCCCGG--CCCCCAAAACCGGAATC-TTTTAATTAAACTATCCCTT-GACGCAGAATAAGC-GCCAACACATAAACTTACCTATATCCTC-TACCGTGCCCAGCAGACCAATATCCGCAACACTTACCTATGTACTATTGTACATCTACTTATTTACCACTAGCATATGACCAGTAGTACTGCTGATTAATCTGACCTAAAA-CATAAAA--TTATTGG-TTTTACATAAACTGTTTAAACTACATGACTATTATACAGGTAATAAGAATGAAATGGTATAGG--ACATAAT…	RN_BRAEi2
Sequence 3 Rio Grande do Norte (RN_BRA)	--------------------------TGTAAA-CCAAAGATTGAAAA------CTAT---AACT--TTCCTAGAATAA-TCAAAAGAGAAGGACTCAAAC-CTTCATCCCCGG-CCCCCCAAAACCGGAATC-TTTTAATTAAACTATCCCTT-GACGCAGAATAAGC-GCCAACACATAAACTTACCTATATCCTC-TACCGTGCCCAGCAGACCAATATCCGCAACACTTACCTATGTACTATTGTACATCTACTTATTTACCACTAGCATATGACCAGTAGTACTGCTGATTAATCTGACCTAAAA-CATAAAA--TTATTGG-TTTTACATAAACTGTTTAAACTACATGACTATTATACAGGTAATAAGAATGAAATGGTATAGG--ACATAAT…	RN_BRAEi3
Sequence 4 Rio Grande do Norte (RN_BRA)	-------------------TTGGTCTTGTAAA-CCAAAGATTGAAAA------CTAT---AACT--TTCCTAGAATAA-TCAAAAGAGAAGGACTCA-AACCTTCATCCCC-G-GCCCCCAAAACCGGAATC-TTTTAATTAAACTATCCCTT-GACGCAGAATAAGC-GCCAACACATAAACTTACCTATATCCTC-TACCGTGCCCAGCAGACCAATATCCGCAACACTTACCTATGTACTATTGTACATCTACTTATTTACCACTAGCATATGACCAGTAGTACTGCTGATTAATCTGACCTAAAA-CATAAAA--TTATTGG-TTTTACATAAACTGTTTAAACTACATGACTATTATACAGGTAATAAGAATGAAATGGTATAGG--ACATAAT…	RN_BRAEi4
Sequence 5 Rio Grande do Norte (RN_BRA)	--------------AAGCATTGGTCTTGTAAA-CCAAAGATTGAAAA------CTAT---AACT--TTCCTAGAATAA-TCAAAAGAGAAGGACTCAAAC-CTTCATCCCCGG--CCCCCAAAACCGGAATC-TTTTAATTAAACTATCCCTT-GACGCAGAATAAGC-GCCAACACATAAACTTACCTATATCCTC-TACCGTGCCCAGCAGACCAATATCCGCAACACTTACCTATGTACTATTGTACATCTACTTATTTACCACTAGCATATGACCAGTAGTACTGCTGATTAATCTGACCTAAAA-CATAAAA--TTATTGG-TTTTACATAAACTGTTTAAACTACATGACTATTATACAGGTAATAAGAATGAAATGGTATAGG--ACATAAT…	RN_BRAEi5
Sequence 6 Rio Grande do Norte (RN_BRA)	------------------ATTGGTCTTGTAAA-CCAAAGATTGAAAA------CTAT---AACT--TTCCTAGAATAA-TCAAAAGAGAAGGACTCA-AACCTTCATCCCC-G-GCCCCCAAAACCGGAATC-TTTTAATTAAACTATCCCTT-GACGCAGAATAAGC-GCCAACACATAAACTTACCTATATCCTC-TACCGTGCCCAGCAGACCAATATCCGCAACACTTACCTATGTACTATTGTACATCTACTTATTTACCACTAGCATATGACCAGTAGTACTGCTGATTAATCTGACCTAAAA-CATAAAA--TTATTGG-TTTTACATAAACTGTTTAAACTACATGACTATTATACAGGTAATAAGAATGAAATGGTATAGG--ACATAAT…	RN_BRAEi6
Sequence 7 Rio Grande do Norte (RN_BRA)	------------------ATTGGTCTTGTAAA-CCAAAGATTGAAAA------CTAT---AACT--TTCCTAGAATAA-TCAAAAGAGAAGGACTCA-AACCTTCATCCCC-G-GCCCCCAAAACCGGAATC-TTTTAATTAAACTATCCCTT-GACGCAGAATAAGC-GCCAACACATAAACTTACCTATATCCTC-TACCGTGCCCAGCAGACCAATATCCGCAACACTTACCTATGTACTATTGTACATCTACTTATTTACCACTAGCATATGACCAGTAGTACTGCTGATTAATCTGACCTAAAA-CATAAAA--TTATTGG-TTTTACATAAACTGTTTAAACTACATGACTATTATACAGGTAATAAGAATGAAATGGTATAGG--ACATAAT…	RN_BRAEi7
Sequence 8 Rio Grande do Norte (RN_BRA)	------------------------CTTGTAAA-CCAAAGATTGAAAA------CTAT---AACT--TTCCTAGAATAA-TCAAAAGAGAAGGACTCAAAC-CTTCATCCCCGG-CCCACCAAAACCGGAATC-TTTTAATTAAACTATCCCTT-GACGCAGAATAAGC-GCCAACACATAAACTTACCTATATCCTC-TACCGTGCCCAGCAGACCAATATCCGCAACACTTACCTATGTACTATTGTACATCTACTTATTTACCACTAGCATATGACCAGTAGTACTGCTGATTAATCTGACCTAAAA-CATAAAA--TTATTGG-TTTTACATAAACTGTTTAAACTACATGACTATTATACAGGTAATAAGAATGAAATGGTATAGG--ACATAAT…	RN_BRAEi8
Sequence 9 Rio Grande do Norte (RN_BRA)	----------CCCTAAGCATTGGTCTTGTAAA-CCAAAGATTGAAAA------CTAT---AACT--TTCCTAGAATAA-TCAAAAGAGAAGGACTCAAAC-CTTCATCCCCGG--CCCCCAAAACCGGAATC-TTTTAATTAAACTATCCCTT-GACGCAGAATAAGC-GCCAACACATAAACTTACCTATATCCTC-TACCGTGCCCAGCAGACCAATATCCGCAACACTTACCTATGTACTATTGTACATCTACTTATTTACCACTAGCATATGACCAGTAGTACTGCTGATTAATCTGACCTAAAA-CATAAAA--TTATTGG-TTTTACATAAACTGTTTAAACTACATGACTATTATACAGGTAATAAGAATGAAATGGTATAGG--ACATAAT…	RN_BRAEi9
Atol das Rocas (AR_BRA); Fernando de Noronha (FN_BRA) Haplotype BR16	---------------------------------------ACGCAGAAT---AAGC-GCC-AACACATAAACT---TACCTATATCCTC-TACCGTGCCCAGCAGACCAATATCCGCAACACTTACC-TATGTACTATTGTACATCTACTTATTTACCACTAGCATATGACCAGTAGTACTGCTGATTAATCTGACCTAAAA-CATAAAA--TTATTGG-TTTTACATAAACTGTTT-AAACTACATGACTATTATACAGGTAA--TAAGAATGAAATGGTATAGG--ACATAATATTAAGTAATTATTCTCAAACATGAATATCGTCACAGTAATGGGTTATTTCTTAGTTCAGCTCATCACGAGAAATAAGCAATCCTTGTTAGTAAGATACAACATT…	---
Atol das Rocas (AR_BRA); Fernando de Noronha (FN_BRA) Haplotype BR10	---------------------------------------ACGCAGAAT---AAGC-GCC-AACACATAAACT---TACCTATATCCTC-TACCGTGCCCAGCAGACCAATATCCGCAACACTTACC-TATGTACTATTGTACATCTACTTATTTACCACTAGCATATGACCAGTAGTACTGCTGATTAATCTGACCTAAAA-CATAGAA--TTATTGG-TTTTACATAAACTGTTT-AAACTACATGACTATTATACAGGTAA--TAAGAATGAAATGGTATAGG--ACATAATATTAAGTAATTATTCTCAAACATGAATATCGTCACAGTAATGGGTTATTTCTTAGTTCAGCTCATCACGAGAAATAAGCAATCCTTGTTAGTAAGATACAACATT…	---
Atol das Rocas (AR_BRA); Fernando de Noronha (FN_BRA) Haplotype BR9	---------------------------------------ACGCAGAAT---AAGC-GCC-AACACATAAACT---TACCTATATCCTC-TACCGTGCCCAGCAGACCAATATCCGCAACACTTACC-TATGTACTATTGTACATCTACTTATTTACCACTAGCATATGACCAGTAGTACTGCTGATTAATCTGACCTAAAA-CATAAAA--TTATTGG-TTTTACATAAACTGTTT-AAACTACATGACTATTATACAGGTAA--TAAGAATGAAATGGTATAGG--ACATAATATTAAGTAATTATTCTCAAACATGAATATCGTCACAGTAATGGGTTATTTCTTAGTTCAGCTCATCACGAGAAATAAGCAATCCTTGTTAGTAAGATACAACATT…	---
Atol das Rocas (AR_BRA); Fernando de Noronha (FN_BRA) Haplotype BR8	---------------------------------------ACGCAGAAT---AAGC-GCC-AACACATAAACT---TACCTATATCCTC-TACCGTGCCCAGCAGACCAATATCCGCAACACTTACC-TATGTACTATTGTACATCTACTTATTTACCACTAGCATATGACCAGTAGTACTGCTGATTAATCTGACCTAAAA-CATAAAA--TTATTGG-TTTTACATAAACTGTTT-AAACTACATGACTATTATACAGGTAA--TAAGAATGAAATGGTATAGG--ACATAATATTAAGTAATTATTCTCAAACATGAATATCGTCACAGTAATGGGTTATTTCTTAGTTCAGCTCATCACGAGAAATAAGCAATCCTTGTTAGTAAGATACAACATT…	---
Atol das Rocas (AR_BRA); Fernando de Noronha (FN_BRA) Haplotype EiBR19	---------------------------------------ACGCAGAAT---AAGC-GCC-AACACATAAACT---TACCTATATCCTC-TACCGTGCCCAGCAGACCAATATCCGCAACACTTACC-TATGTATTATTGTACATCTACTTATTTACCACTAGCATATGACCAGTAGTACTGCTGATTAATCTGACCTAAAA-CATAGAA--TTATTGG-TTTTACATAAACTGTTT-AAACTACATGACTATTATACAGGTAA--TAAGAATGAAATGGTATAGG--ACATAATATTAAGTAATTATTCTCAAACATGAATATCGTCACAGTAATGGGTTATTTCTTAGTTCAGCTCATCACGAGAAATAAGCAATCCTTGTTAGTAAGATACAACATT…	---
Atol das Rocas (AR_BRA); Fernando de Noronha (FN_BRA) Haplotype EiBR18	---------------------------------------ACGCAGAAT--TAAGC-GCC-AACACACAAATT---TACCTATATCCTC-TACCGTGCCCAGCAGACCAATATCCGCAACACTTACC-TATGTATTATTGTACATCTACTTATTTACCACTAGCATATGACCGGTAGTATTGCTGATTAATTTGACCTAAAA-CATAAAA--TTATTGG-TTTTACATAAACTGTTC-AAATTACATGACTATTATATAGGTAA--TAAAAATGAAATGGTATGGG--ACATAACATTAAGTAATTATTCTCAACCATGAATATCGTCACAGTAATAGGTTATTTCTTAGTTTGACTCATCACGAGAAATAAGCAACCCTTGCTAGTAAGATACAACATT…	---
Atol das Rocas (AR_BRA); Fernando de Noronha (FN_BRA) Haplotype EiBR17	---------------------------------------ACGCAGAAT---AAGC-GCC-AACACATAAACT---TACCTATATCCTC-TACCGTGCCCAGCAGACCAATATCCGCAACACTTACC-TATGTACTATTGTACATCTACTTATTTACCACTAGCATATGACCAGTAGTACTGCTGATTAATCTGACCTAAAA-CATAAAA--TTATTGG-TTTTACATAAACTGTTT-AAACTACATGACTATTATACAGGTAA--TAAGAATGAAATGGTATAGG--ACATAATATTAAGTAATTATTCTCAAACATGAATATCGTCACAGTAATGGGTTATTTCTTAGTTCAGCTCATCACGAGAAATAAGCAATCCTTGTTAGTAAGATACAACATT…	---
Atol das Rocas (AR_BRA); Fernando de Noronha (FN_BRA) Haplotype EiBR15	---------------------------------------ACGCAGAAT---AAGC-GCC-AACACACAAACT---TACCTATATCCTC-TACCGTGCCCAGCAGACCAATATCCGCAACACTTACC-TATGTATTATTGTACATCTACTTATTTACCGCTAGCATATGACCGGTAGTACTGCTGATTAATCTGACCTAAAA-CATAAAA--TTATTGG-TTTCACATAAACTGTTT-AAACTACATGACTATTATACGGGTAA--TAAGAATGAAATGGTATAGG--ACATAATATTAAGTAATTATTCTCAAACATGAATATTGTCACAGTAATGGGTTATTTCTTAGTTCAGCTCATCACGAGAAATAAGCAACCCTTGTTAGTAAGATACAACATT…	---
Atol das Rocas (AR_BRA); Fernando de Noronha (FN_BRA) Haplotype EiBR14	---------------------------------------ACGCAAAAT---AAGC-GCC-AACACACAAATT---TACCTATATCCTC-TACCGTGCCCAGAAGACCAATAGCCGCAATACTTACC-TATGTATTATTGTACATCTACTTATTTACCGCTAGCATATGACCAGTAGTACTGCTGATTAATTTGACCTAAAA-CATAAAA--TTATTGG-TTTTACATAAACTGTTT-AAATTAAATGACTATTATATAGGTAA--TAAAAATGAAATGGTATAGG--ACATAACATTAAGCAATTATTCTTAACCATGAATATCGTCACAGTAATAGGTTATTTCTTAGTTTAACTCATCACGAGAAATAAGCAACCCTTGTTAGTAAGATACAACATT…	---
Atol das Rocas (AR_BRA); Fernando de Noronha (FN_BRA) Haplotype EiBR13	---------------------------------------ACGCAGAAT---AAGC-GCC-AACACATAAACT---TACCTATATCCTC-TACCGTGCCCAGCAGACCAATATCCGCAACACTTACC-TATGTATTATTGTACATCTACTTATTTACCGCTAGCATATGACCGGTAGTACTGCTGATTAATCTGACCTAAAA-CATAAAA--TTATTGG-TTTCACATAAACTGTTT-AAACTACATGACTATTATACGGGTAA--TAAGAATGAAATGGTATAGG--ACATAATATTAAGTAATTATTCTCAAACATGAATATTGTCACAGTAATGGGTTATTTCTTAGTTCAGCTCATCACGAGAAATAAGCAACCCTTGTTAGTAAGATACAACATT…	---
Atol das Rocas (AR_BRA); Fernando de Noronha (FN_BRA) Haplotype EiBR12	---------------------------------------ACGCAGAAT---AAGC-GCC-AACACATAAACT---TACCTATATCCTC-TACCGTGCCCAGCAGACCAATATCCGCAACACTTACC-TATGTACTATTGTACATCTACTTATTTACCACTAGCATATGACCAGTAGTACTGCTGATTAATCTGACCTAAAA-CATAAAA--TTATTGG-TTTTACATAAACTGTTT-AAACTACATGACTATTATACAGGTAA--TAAGAATGAAATGGTATAGG--ACATAATATTAAGTAATTATTCTCAAACATGAATATCGTCACGGTAATGGGTTATTTCTTAGTTCAGCTCATCACGAGAAATAAGCAATCCTTGTTAGTAAGATACAACATT…	---
Atol das Rocas (AR_BRA); Fernando de Noronha (FN_BRA) Haplotype EiBR7	---------------------------------------ACGCAGAAT--TAAGC-GCC-AACACACAAATT---TACCTATATCCTC-TACCGTGCCCAGCAGACCAATATCCGCAACACTTACC-TATGTATTATTGTACATCTACTTATTTACCACTAGCATATGACCGGTAGTATCGCTGATTAATTTGACCTAAAA-CATAAAA--TTATTGG-TTTTACATAAACTGTTC-AAATTACATGACTATTATATAGGTAA--TAAAAATGAAATGGTATGGG--ACATAACATTAAGTAATTATTCTCAACCATGAATATCGTCACAGTAATAGGTTATTTCTTAGTTTGACTCATCACGAGAAATAAGCAACCCTTGCTAGTAAGATACAACATT…	---
Atol das Rocas (AR_BRA); Fernando de Noronha (FN_BRA) Haplotype EiBR6	---------------------------------------ACGCAGAAT--TAAGC-GCC-AACACACAAATT---TACCTATATCCTC-TACCGTGCCCAGCAGACCAATATCCGCAACACTTACC-TATGTATTATTGTACATCTACTTATTTACCACTAGCATATGACCGGTAGTATCGCTGATTAATTTGACCTAAAA-CATAAAA--TTATTGG-TTTTACATAAACTGTTC-AAATTACATGACTATTATATAGGTAA--TAAAAATGAAATGGTATGGG--ACATAACATTAAGTAATTATTCTCAACCATGAATATCGTCACAGTAATAGGTTATTTCTTAGTTTGACTCATCACGAGAAATAAGCAACCCTTGCTAGTAAGATACAACATT…	---
Atol das Rocas (AR_BRA); Fernando de Noronha (FN_BRA) Haplotype EiBR5	---------------------------------------ACGCAGAAT--TAAGC-GCC-AACACACAAATT---TACCTATATCCTC-TACCGTGCCCAGCAGACCAATATCCGCAACACTTACC-TATGTATTATTGTACATCTACTTATTTACCACTAGCATATGACCGGTAGTATCGCTGATTAATTTGACCTAAAA-CATAAAA--TTATTGG-TTTTACATAAACTGTTC-AGATTACATGACTATTATATAGGTAA--TAAAAATGAAATGGTATGGG--ACATAACATTAAGTAATTATTCTCAACCATGAATATCGTCACAGTAATAGGTTATTTCTTAGTTTGACTCATCACGAGAAATAAGCAACCCTTGCTAGTAAGATACAACATT…	---
Costa Rica (CR) Haplotype EiIP131	CCCCAAAACCGGAATC-TTTCAATTAAACTACCCT-TTGACGCAAAAT---AAGC-GCC-AACACACAAATT---TACCTATATCCTC-TACCGTGCCCAGAAGACCAATAGCCGCAATACTTACC-TATGTATTATTGTACATCTACTTATTTACCGCTAGCATATGACCAGTAGTACTGCTGATTAATTTGACCTAAAA-CATAAAA--TTATTGG-TTTTACATAAACTGTTT-AAATTAAATGACTATTATATAGGTAA--TAAAAATGAAATGGTATGGG--ACATAACATTAAGCAATTATTCTTAACCATGAATATCGTCACAGTAATAGGTTATTTCTTAGTTTAACTCATCACGAGAAATAAGCAACCCTTGTTAGTAAGATACAACATT…	---
Israel (ISR) Haplotype RS4	CCCCAAAACCGGAATC-TTTCAATTAAACTACCCT-TTGACGCAGAATT--AAGC-GCC-AACACACAAATT---TACCTATATCCTC-TACCGTGCCCAGCAGACCAATATCCGCAACACTTACC-TATGTATTATTGTACATCTACTTATTTACCACTAGCATATGATCGGTAATATCGTCGATTAATTTGGCCCAAAA-CATAAAA--TTATTGG-TTTTACATAAACTGTTC-AAATTACATGACTATTATATGGGTAA--TGAAAATGAAATGGTATAGG--ACATAACATTAAGCAATTATTCTCAACCATGAATATCGTCACAGTAATAGGTTATTTCTTAGTTTGACTCATCACGAGAAATAAGCAACCCTTGCTAGCAAGATACAACATT…	---
Israel (ISR) Haplotype RS3	CCCCAAAACCGGAATC-TTTCAATTAAACTACCCT-TTGACGCAGAATT--AAGC-GCC-AACACACAAATT---TACCTATATCCTC-TACCGTGCCCAGCAGACCAATATCCGCAACACTTACC-TATGTATTATTGTACATCTACTTATTTACCACTAGCATATGATCGGTAGTATCGTCGATTAATTTGGCCCAAAA-CATAAAA--TTATTGG-TTTTACATAAACTGTTC-AAATTACATGACTATTATATGGGTAA--TGAAAATGAAATGGTATAGG--ACATAACATTAAGCAATTATTCTCAACCATGAATATCGTCACAGTAATAGGTTATTTCTTAGTTTGACTCATCACGAGAAATAAGCAACCCTTGCTAGCAAGATACAACATT…	---
Israel (ISR) Haplotype RS2	CCCCAAAACCGGAATC-TTTCAATTAAACTACCCT-TTGACGCAGAATT--AAGC-GCC-AACACACAAATT---TACCTATATCCTC-TACCGTGCCCAGCAGACCAATATCCGCAACACTTACC-TATGTATTATTGTACATCTACTTATTTACCACTAGCATATGATCGGTAGTATCGTCGATTAATTTGACCCAAAA-CATAAAA--TTATTGG-TTTTACATAAACTGTTC-AAATTACATGACTATTATATGGGTAA--TGAAAATGAAATGGTATAGG--ACATAACATTAAGCAATTATTCTCAACCATGAATATCGTCACAGTAATAGGTTATTTCTTAGTTTGACTCATCACGAGAAATAAGCAACCCTTGCTAGCAAGATACAACATT…	---
Mexico (MEX) Haplotype EI_EP06	CCCCAAAACCGGAATC-TTTCAATTAAACTACCCT-TTGACGCAAAAT---AAGC-GCC-AACACACAAATT---TACCTATATCCTC-TACCGTGCCCAGAAGACCAATAGCCGCAATACTTACC-TATGTATTATTGTACATCTACTTATTTACCGCTAGCATATGACCAGTAATACTGCTGATTAATTTGACCTAAAA-CATAAAA--TTATTGG-TTTTACATAAACTGTTT-AAATTAAATGACTATTATATAGGTAA--TAAAAATGAAATGGTATAGG--ACATAACATTAAGCAATTATTCTTAACCATGAATATCGTCACAGTAATAGGTTATTTCTTAGTTTAACTCATCACGAGAAATAAGCAACCCTTGTTAGTAAGATACAACATT…	---
Mexico (MEX) Haplotype EI_EP04	CCCCAAAACCGGGATC-TTTCAATTAAACTACCCT-TTGACGCAAAAT---AAGC-GCC-AACACACAAATT---TACCTATATCCTC-TACCGTGCCCAGAAGACCAATAGCCGCAATACTTACC-TATGTATTATTGTACATCTACTTATTTACCGCTAGCATATGACCAGTAGTACTGCTGATTAATTTGACCTAAAA-CATAAAA--TTATTGG-TTTTACATAAACTGTTT-AAATTAAATGACTATTATATAGGTAA--TAAAAATGAAATGGTATAGG--ACATAACATTAAGCAATTATTCTTAACCATGAATATCGTCACAGTAATAGGTTATTTCTTAGTTTAACTCATCACGAGAAATAAGCAACCCTTGTTAGTAAGATACAACATT…	---
Mexico (MEX) Haplotype EiIP106	CCCCAAAACCGGAATC-TTTCAATTAAACTACCCT-TTGACGCAAAAT---AAGC-GCC-AACACACAAATT---TACCTATATCCTC-TACCGTGCCCAGAAGACCAATAGCCGCAATACTTACC-TATGTATTATTGTACATCTACTTATTTACCGCTAGCATATGACCAGTAATACTGCTGATTAATTTGACCTAAAA-CATAAAA--TTATTGG-TTTTACATAAACTGTTT-AAATTAAATGACTATTATATAGGTAA--TAAAAATGAAATGGTATAGG--ACATAACATTAAGCAATTATTCTTAACCATGAATATCGTCACAGTAATAGGTTATTTCTTAGTTTAACTCATCACGAGAAATAAGCAACCCTTGTTAGTAAGATACAACATT…	---
Malaysia (MAS) Haplotype MYEi_F4	------------------------------------------------------------------------------------------------------------------------------------------------------------------------------------GCTGATTAATTTGACCTAAAA-CATAAAA--TTATTGG-TTTTACATAAACTGTTT-AAATTAAATGACTATTATATAGGTAA--TAAAAGTGAAATGGTATAGG--ACATAACATTAAGCAATTATTCTTAACCATGAATATCGTCACAGTAATAGGTTATTTCTTAGTTTAACTCATCACGAGAAATAAGCAACCCTTGTTAGTAAGATACAACATT…	---
Malaysia (MAS) Haplotype MYEi_F3	------------------------------------------------------------------------------------------------------------------------------------------------------------------------------------GCTGATTAATTTGACCTAAAA-CATAAAA--TTATTGG-TTTTACATAAACTGTTT-AAATTACATGACTATTATATAGGTAA--TAAAAATGAAATGATATGGG--ACATAACATTAAGTAATTATTCTCAACCATGAATATCGTCACAGTAATGGGTTATTTCTTAGTTTAACTCATCACGAGAAATAAGCAACCCTTGTTAGTAAGATACAACATT…	---
Malaysia (MAS) Haplotype MYEi_F2	------------------------------------------------------------------------------------------------------------------------------------------------------------------------------------GCTGATTAATTTGACCTAAAA-CATAAAA--TTATTGG-TTTTACATAAACTGTTT-AAATTAAATGACTATTATATAGGTAA--TAAAAATGAAATGATATAGG--ACATAACATTAAGCAATTATTCTTAACCATGAATATCGTCACAGTAATAGGTTATTTCTTAGTTTAACTCATCACGAGAAATAAGCAACCCTTGTTAGTAAGATACAACATT…	---
Malaysia (MAS) Haplotype MYEi_F1	------------------------------------------------------------------------------------------------------------------------------------------------------------------------------------GCTGATTAATTTGACCTAAAA-CATAAAA--TTATTGG-TTTTACATAAACTGTTT-AAATTAAATGACTATTATATAGGTAA--TAAAAATGAGATGGTATAGG--ACATAACATTAAGCAATTATTCTTAACCATGAATATCGTCACAGTAATAGGTTATTTCTTAGTTTAACTCATCACGAGAAATAAGCAACCCTTGTTAGTAAGATACAACATT…	---
Caribbean (CAR) Haplotype EiA44	---------------------------------------ACGCAGAAT---AAGC-GCC-AACACATAAACT---TACCTATATCCTC-TACCGTGCCCAGCAGACCAATATCCGCAACACTTACC-TATGTATTATTGTACATCTACTTATTTACCGCTAGCATATGACCGGTAGTACTGCTGATTAATCTGACCTAAAA-CATAAAA--TTATTGG-TTTCACATAAACTGTTT-AAACTACATGACTATTATACAGGTAA--TAAGAATGAAATGGTATAGG--ACATAATATTAAGTAATTATTCTCAAACATGAATATTGTCACAGTAATGGGTTATTTCTTAGTTCAGCTCATCACGAGAAATAAGCAACCCTTGTTAGTAAGATACAACATT…	---
Caribbean (CAR) Haplotype EiA83	---------------------------------------ACGCAGAAT---AAGC-GCC-AACACATAAACT---TACCTATATCCTC-TACCGTGCCCAGCAGACCAATATCCGCAACACTTACC-TATGTATTATTGTACATCTACTTATTTACCGCTAGCATATGACCGGTAGTACTGCTGATTAATCTGACCTAAAA-CATAAAA--TTATTGG-TTTCACATAAACTGTTT-AAACTACATGACTATTATACAGGTAA--TAAGAATGAAATGGTATAGG--ACATAATATTAAGTAATTATTCTCAAACATGAATATTGTCACAGTAATGGGTTATTTCTTAGTTCAGCTCATCACGAGAAATAAGCAACCCTTGTTAGTAAGATACAACATT…	---
Caribbean (CAR) Haplotype EiA48	---------------------------------------ACGCAGAAT--TAAGC-GCC-AACACACAAATT---TACCTATATCCTC-TACCGTGCCCAGCAGACCAATATCCGCAACACTTACC-TATGTATTATTGTACATCTACTTATTTACCACTAGCATATGACCGGTAGTATCGCTGATTAATTTGACCTAAAA-CATAAAA--TTATTGG-TTTTACATAAACTGTTC-AAATTACATGACTATTATATAGGTAA--TAAAAATGAAATGGTATGGG--ACATAACATTAAGTAATTATTCTCAACCATGAATATCGTCACAGTAATAGGTTATTTCTTAGTTTGACTCATCACGAGAAATAAGCAACCCTTGCTAGTAAGATACAACATT…	---
Caribbean (CAR) Haplotype Ei-A72	-----------------------TTAAACTATCCC-TTGACGCAGAAT---AAGC-GCC-AACACATAAACT---TACCTATATCCTC-TACCGTGCCCAGCAGACCAATATCCGCAACACTTACC-TATGTACTATTGTACATCTACTTATTTACCACTAGCATATGACCAGTAGTACTGCTGATTAATCTGACCTAAAA-CATAAAA--TTATTGG-TTTTACATAAACTGTTT-AAACTACATGACTATTATACAGGTAA--TAAGAATGAAATGGTATAGG--ACATAATATTAAGTAATTATTCTCAAACATGAATATCGTCACAGTAATGGGTTATTTCTTAGTTCAGCTCATCACGAGAAATAAGCAATCCTTGTTAGTAAGATACAACATT…	---
Australia (AUS) Haplotype EiIP74	CCCCAAAACCGGAATC-TTTCAATTAAACTACCCT-TTGACGCAAAAT---AAGC-GCC-AACACACAAATT---TACCTATATCCTC-TACCGTGCCCAGAAGACCAATAGCCGCAATACTTACC-TATGTATTATTGTACATCTACTTATTTACCGCTAGCATATGACCAGTAGTACTGCTGATTAATTTGACCTAAAA-CATAAAA--TTATTGG-TTTTACATAAACTGTTT-AAATTAAATGACTATTATATAGGTAA--TAAAAATGAAATGGTATGGG--ACATAACATTAAGCAATTATTCTTAACCATGAATATCGTCACAGTAATAGGTTATTTCTTAGTTTAACTCATCACGAGAAATAAGCAACCCTTGTTAGTAAGATACAACATT…	---
Australia (AUS) Haplotype EiIP73	CCCCAAAACCGGAATC-TTTCAATTAAACTACCCT-TTGACGCAAAATT--AAGC-GCC-AACACACAAATT---TACCTATATCCTC-TACCGTGCCCAGAAGACCAATAGCCGCAATACTTACC-TATGTATTATTGTACATCTACTTATTTACCGCTAGCATATGACCAGTAGTACTGCTGATTAATTTGACCTAAAA-CATAAAA--TTATTGG-TTTTACATAAACTGTTT-AGATTAAATGACTATTATATAGGTAA--TAAAAATGAAATGGTATAGG--ACATAACATTAAGCAATTATTCTTAACCATGAATATCGTCACAGTAATAGGTTATTTCTTAGTTTAACTCATCACGAGAAATAAGCAACCCTTGTTAGTAAGATACAACATT…	---
Australia (AUS) Haplotype EiIP72	CCCCAAAACCGGAATC-TTTCAATTAAACTACCCT-TTGACGCAAAAT---AAGC-GCC-AACACACAAATT---TACCTATATCCTC-TACCGTGCCCAGAAGACCAATAGCCGCAATACTTACC-TATGTATTATTGTACATCTACTTATTTACCGCTAGCATATGACCAGTAGTACTGCTGATTAATTTGACCTAAAA-CATAAAA--TTATTGG-TTTTACATAAACTGTTT-AAATTAAATGACTATTATATAGGTAA--TAAAAATGAAATGGTATAGG--ACATAACATTAAGCAATTATTCTTAACCATGAATATCGTTACAGTAATAGGTTATTTCTTAGTTTAACTCATCACGAGAAATAAGCAACCCTTGTTAGTAAGATACAACATT…	---
Australia (AUS) Haplotype EiIP71	CCCCAAAACCGGAATC-TTTCAATTAAACTACCCT-TTGACGCAAAAT---AAGC-GCC-AACACACAAATT---TACCTATATCCTC-TACCGTGCCCAGAAGACCAATAGCCGCAATACTTACC-TATGTATTATTGTACATCTACTTATTTACCGCTAGCATATGACCAGTAGTACTGCTGATTAATTTGACCTAAAA-CATAAAA--TTATTGG-TTTTACATAAACTGTTT-AAATTAAATGACTATTATATAGGTAA--TAAAAATGAAATGGTATAGG--ACATAACATTAAGCAATTATTCTTAACCATGAATATCGTCACAGTAATAGGTTATTTCTTAGTTTAACTCATCACGAGAAATAAGCAACCCTTGTTAGTAAGATACAACATT…	---
Australia (AUS) Haplotype EiIP59	CCCCAAAACCGGAATC-TTTCAATTAAACTACCCT-TTGACGCAAAAT---AAGC-GCC-AACACACAAATT---TACCTATATCCTC-TACCGTGCCCAGAAGACCAATAGCCGCAATACTTACC-TATGTATTATTGTACATCTACTTATTTACCGCTAGCATATGACCAGTAGTACTGCTGATTAATTTGACCTAAAA-CATAAAA--TTATTGG-TTTTACATAAACTGTTT-AAATTAAATGACTATTATATAGGTAA--TAAAAATGAAATGGTATAGG--ACATAACATTAAGCAATTATTCTTAACCATGAATATCGTCACAGTAATAGGTTATTTCTTAGTTTAACTCATCACGAGAAATAAGCAACCCTTGTTAGTAAGATACAACATT…	---
Australia (AUS) Haplotype EiIP39	CCCCAAAACCGGAATC-TTTCAATTAAACTACCCT-TTGACGCAAAAT---AAGC-GCC-AACACACAAATT---TACCTATATCCTC-TACCGTGCCCAGAAGACCAATAGCCGCAATACTTACC-TATGTATTATTGTACATCTACTTATTTACCGCTAGCATATGACCAGTAGTACTGCTGATTAATTTGACCTAAAA-CATAAAA--TTATTGG-TTTTACATAAACTGTTT-AAATTAAATGACTATTATATAGGTAA--TAAAAATGAAATGGTATAGG--ACATAACATTAAGCAATTATTCTTAACCATGAATATCGTCACAGTAATAGGTTATTTCTTAGTTTAACTCATCACGAGAAATAAGCAACCCTTGTTAGTAAGATACAACATT…	---
Puerto Rico (PUR) Haplotype EiA68	---------------------------------------ACGCAGAAT---AAGC-GCC-AACACAGAAACT---TACCTATATCCTC-TACCGTGCCCAGCAGACCAATATCCGCAACACTTACC-TATGTACTATTGTACATCTACTTATTTACCACTAGCATATGACCAGTAGTACTGCTGATTAATCTGACCTAAAA-CATAAAA--TTATTGG-TTTTACATAAACTGTTT-AAACTACATGACTATTATACAGGTAA--TAAGAATGAAATGGTATAGG--ACATAATATTAAGTAATTATTCTCAAACATGAATATCGTCACAGTAATGGGTTATTTCTTAGTTCAGCTCATCACGAGAAATAAGCAATCCTTGTTAGTAAGATACAACATT…	---
Puerto Rico (PUR) Haplotype EiA60	---------------------------------------ACGCAGAAT---AAGC-GCC-AACACATAAACT---TACCTATATCCTC-TACCGTGCCCAGCAGACCAATATCCGCAACACTTACC-TATGTATTATTGTACATCTACTTATTTACCGCTAGCATATGACCGGTAGTATTGCTGATTAATCTGACCTAAAA-CATAAAA--TTATTGG-TTTCACATAAACTGTTT-AAACTACATGACTATTATACGGGTAA--TAAGAATGAAATGGTATGGG--ACATAATATTAAGTAATTATTCTCAAACATGAATATTGTCACAGTAATGGGTTATTTCTTAGTTCAGCTCATCACGAGAAATAAGCAACCCTTGTTAGTAAGATACAACATT…	---
Puerto Rico (PUR) Haplotype EiA59	---------------------------------------ACGCAGAAT---AAGC-GCC-AACACATAAACT---TACCTATATCCTC-TACCGTGCCCAGCAGACCAATATCCGCAACACTTACC-TATGTATTATTGTACATCTACTTATTTACCGCTAGCATATGACCGGTAGTACTGCTGATTAATCTGACCTAAAA-CATAAAA--TTATTGG-TTTCACATAAACTGTTT-AAACTACATGACTATTATACAGGTAA--TAAGAATGAAATGGTATAGG--ACATAATATTAAGTAATTATTCTCAAACATGAATATTGTCACAGTAATGGGTTATTTCTTAGTTCAGCTCGTCACGAGAAATAAGCAACCCTTGTTAGTAAGATACAACATT…	---
Puerto Rico (PUR) Haplotype EiA58	---------------------------------------ACGCAGAAT---AAGC-GCC-AACACATAAACT---TACCTATATCCTC-TACCGTGCCCAGCAGACCAATATCCGCAACACTTACC-TATGTATTATTGTACATCTACTTATTTACCGCTAGCATATGACCGGTAGTACTGCTGATTAATCTGACCTAAAA-CATAAAA--TTATTGG-TTTCACATAAACTGTTT-AAACTACATGACTATTATACAGGTAA--TAAGAATGAAATGGTATAGG--ACATAATATTAAGTAATTATTCTCAAACATGAATATTGTCACAGTAATGGGTTATTTCTTAGTTCAGCTCATCACGAGAAATAAGCAACCCTTGTTAGTAAGATACAACATT…	---
Puerto Rico (PUR) Haplotype EiA36	---------------------------------------ACGCAGAAT---AAGC-GCC-AACACATAAACT---TACCTATATCCTC-TACCGTGCCCAGCAGACCAATATCCGCAACACTTACC-TATGTACTATTGTACATCTACTTATTTACCACTAGCATATGACCAGTAGTACCGCTGATTAATCTGACCTAAAA-CATAAAA--TTATTGG-TTTTACATAAACTGTTT-AAACTACATGACTATTATACAGGTAA--TAAGAATGAAATGGTATAGG--ACATAATATTAAGTAATTATTCTCAAACATGAATATCGTCACAGTAATGGGTTATTTCTTAGTTCAGCTCATCACGAGAAATAAGCAATCCTTGTTAGTAAGATACAACATT…	---
Puerto Rico (PUR) Haplotype EiA29	---------------------------------------ACGCAGAAT---AAGC-GCC-AACACATAAACT---TACCTATATCCTC-TACCGTGCCCAGCAGACCAATATCCGCAACACTTACC-TATGTATTATTGTACATCTACTTATTTACCGCTAGCATATGACCGGTAGTACTGCTGATTAATCTGACCTAAAA-CATAAAA--TTATTGG-TTTTACATAAACTGTTT-AAACTACATGACTATTATACAGGTAA--TAAGAATGAAATGGTATAGG--ACATAATATTAAGTAATTATTCTCAAACATGAATATTGTCACAGTAATGGGTTATTTCTTAGTTCAGCTCATCACGAGAAATAAGCAACCCTTGTTAGTAAGATACAACATT…	---
Puerto Rico (PUR) Haplotype EiA27	---------------------------------------ACGCAGAAT---AAGC-GCC-AACACATAAACT---TACCTATATCCTC-TACCGTGCCCAGCAGACCAATATCCGCAACACTTACC-TATGTACTATTGTACATCTACTTATTTACCACTAGCATATGACCAGTAGTACTGCTGATTAATCTGACCTAAAA-CATAAAA--TTATTGG-TTTTACATAAACTGTTT-AAACTACATGACTATTATACAGGTAA--TAAGAATGAAATGGTATAGG--ACATAATATTAAGTAATTATTCTCAAACATGAATATCGTCACAGTAATGGGTTATTTCTTAGTTCAGCTCATCACGAGAAATAAGCAACCCTTGTTAGTAAGATACAACATT…	---
Puerto Rico (PUR) Haplotype EiA43	---------------------------------------ACGCAGAAT---AAGC-GCC-AACACATAAACT---TACCTATATCCTC-TACCGTGCCCAGCAGACCAATATCCGCAACACTTACC-TATGTATTATTGTACATCTACTTATTTACCGCTAGCATATGACCGGTAGTACTGCTGATTAATCTGACCTAAAA-CATAAAA--TTATTGG-TTTCACATAAACTGTTT-AAACTACATGACTATTATACAGGTAA--TAAGAATGAAATGGTATAGG--ACATAATATTAAGTAATTATTCTCAAACATGAATATTGTCACAGTAATGGGTTATTTCTTAGTTCAGCTCATCACGAGAAATAAGCAACCCTTGTTAGTAAGATACAACATT…	---
Puerto Rico (PUR) Haplotype EiA41	---------------------------------------ACGCAGAAT---AAGC-GCC-AACACATAAACT---TACCTATATCCTC-TACCGTGCCCAGCAGACCAATATCCGCAACACTTACC-TATGTATTATTGTACATCTACTTATTTACCACTAGCATATGACCGGTAGTACTGCTGATTAATCTGACCTAAAA-CATAAAA--TTATTGG-TTTCACATAAACTGTTT-AAACTACATGACTATTATACAGGTAA--TAAGAATGAAATGGTATAGG--ACATAATATTAAGTAATTATTCTCAAACATGAATATTGTCACAGTAATGGGTTATTTCTTAGTTCAGCTCATCACGAGAAATAAGCAACCCTTGTTAGTAAGATACAACATT…	---
Puerto Rico (PUR) Haplotype EiA24	---------------------------------------ACGCAGAAT---AAGC-GCC-AACACATAAACT---TACCTATATCCTC-TACCGTGCCCAGCAGACCAATATCCGCAACACTTACC-TATGTATTATTGTACATCTACTTATTTACCGCTAGCATATGACCGGTAGTACTGCTGATTAATCTGACCTAAAA-CATAAAA--TTATTGG-TTTCACATAAACTGTTT-AAACTACATGACTATTATACAGGTAA--TAAGAATGAAATGGTATAGG--ACATAATATTAAGTAATTATTCTCAAACATGAATATTGTCACAGTAATGGGTTATTTCTTAGTTCAGCTCATCACGAGAAATAAGCAACCCTTGTTAGTAAGATACAACATT…	---
Puerto Rico (PUR) Haplotype EiA23	---------------------------------------ACGCAGAAT---AAGC-GCC-AACACATAAACT---TACCTATATCCTC-TACCGTGCCCAGCAGACCAATATCCGCAACACTTACC-TATGTATTATTGTACATCTACTTATTTACCACTAGCATATGACCGGTAGTACTGCTGATTAATCTGACCTAAAA-CATAAAA--TTATTGG-TTTCACATAAACTGTTT-AAACTACATGACTATTATACAGGTAA--TAAGAATGAAATGGTATAGG--ACATAATATTAAGTAATTATTCTCAAACATGAATATTGTCACAGTAATGGGTTATTTCTTAGTTCAGCTCATCACGAGAAATAAGCAACCCTTGTTAGTAAGATACAACATT…	---
Puerto Rico (PUR) Haplotype EiA22	---------------------------------------ACGCAGAAT---AAGC-GCC-AACACATAAACT---TACCTATATCCTC-TACCGTGCCCAGCAGACCAATATCCGCAACACTTACC-TATGTATTATTGTACATCTACTTATTTACCACTAGCATATGACCGGTAGTACTGCTGATTAATCTGACCTAAAA-CATAAAA--TTATTGG-TTTCACATAAACTGTTT-AAGCTACATGACTATTATACAGGTAA--TAAGAATGAAATGGTATAGG--ACATAATATTAAGTAATTATTCTCAAACATGAATATTGTCACAGTAATGGGTTATTTCTTAGTTCAGCTCATCACGAGAAATAAGCAACCCTTGTTAGTAAGATACAACATT…	---
Puerto Rico (PUR) Haplotype EiA21	---------------------------------------ACGCAGAAT---AAGC-GCC-AACACATAAACT---TACCTATATCCTC-TACCGTGCCCAGCAGACCAATATCCGCAACACTTACC-TATGTACTATTGTACATCTACTTATTTACCACTAGCATATGACCAGTAGTACTGCTGATTAATCTGACCTAAAA-CATAAAA--TTATTGG-TTTTACATAAACTGTTT-AAACTACATGACTATTATACAGGTAA--TAAGAATGAAATGGTATAGG--ACATAATATTAAGTAATTATTCTCAAACATGAATATCGTCACAGTAATGGGTTATTTCTTAGTTCAGCTCATCACGAGAAATAAGCAATCCTTGTTAGTAAGATACAACATT…	---
Puerto Rico (PUR) Haplotype EiA20	---------------------------------------ACGCAGAAT---AAGC-GCC-AACACATAAACT---TACCTATATCCTC-TACCGTGCCCAGCAGACCAATATCCGCAACACTTACC-TATGTATTATTGTACATCTACTTATTTACCGCTAGCATATGACCGGTAGTACTGCTGATTAATCTGACCTAAAA-CATAAAA--TTATTGG-TTTCACATAAACTGTTT-AAACTACATGACTATTATACGGGTAA--TAAGAATGAAATGGTATAGG--ACATAATATTAAGTAATTATTCTCAAACATGAATATTGTCACAGTAATGGGTTATTTCTTAGTTCAGCTCATCACGAGAAATAAGCAACCCTTGTTAGTAAGATACAACATT…	---
Puerto Rico (PUR) Haplotype EiA47	---------------------------------------ACGCAGAAT---AAGC-GCC-AACACATAAACT---TACCTATATCCTC-TACCGTGCCCAGCAGACCAATATCCGCAACACTTACC-TATGTATTATTGTACATCTACTTATTTACCGCTAGCATATGACCGGTAGTACTGCTGATTAATCTGACCTAAAA-CATAAAA--TTATTGG-TTTCACATAAACTGTTT-AAACTACATGACTATTATACAGGTAA--TAAGAATGAAATGGTATAGG--ACATAATATTAAGTAATTATTCTCAAACATGAATATTGTCACAGTAATGGGTTATTTCTTAGTTCAGCTCATCACGAGAAATAAGCAACCCTTGTTAGTAAGATACAACATT…	---
Puerto Rico (PUR) Haplotype EiA18	---------------------------------------ACGCAGAAT---AAGC-GCC-AACACATAAACT---TACCTATATCCTC-TACCGTGCCCAGCAGACCAATATCCGCAACACTTACC-TATGTATTATTGTACATCTACTTATTTACCGCTAGCATATGACCGGTAGTACTGCTGATTAATCTGACCTAAAA-CATAAAA--TTATTGG-TTTCACATAAACTGTTT-AAACTACATGACTATTATACAGGTAA--TAAGAATGAAATGGTATAGG--ACATAATATTAAGTAATTATTCTCAAACATGAATATTGTCACAGTAATGGGTTATTTCTTAGTTCAGCTCATCACGAGAAATAAGCAACCCTTGTTAGTAAGATACAACATT…	---
Puerto Rico (PUR) Haplotype EiA45	---------------------------------------ACGCAGAAT---AAGC-GCC-AACACACAAACT---TACCTATATCCTC-TACCGTGCCCAGCAGACCAATATCCGCAACACTTACC-TATGTATTATTGTACATCTACTTATTTACCGCTAGCATATGACCGGTAGTACTGCTGATTAATCTGACCTAAAA-CATAAAA--TTATTGG-TTTCACATAAACTGTTT-AAACTACATGACTATTATACGGGTAA--TAAGAATGAAATGGTATAGG--ACATAATATTAAGTAATTATTCTCAAACATGAATATTGTCACAGTAATGGGTTATTTCTTAGTTCAGCTCATCACGAGAAATAAGCAACCCTTGTTAGTAAGATACAACATT…	---
Puerto Rico (PUR) Haplotype EiA11	---------------------------------------ACGCAGAAT---AAGC-GCC-AACACATAAACT---TACCTATATCCTC-TACCGTGCCCAGCAGACCAATATCCGCAACACTTACC-TATGTATTATTGTACATCTACTTATTTACCGCTAGCATATGACCGGTAGTACTGCTGATTAATCTGACCTAAAA-CATAAAA--TTATTGG-TTTCACATAAACTGTTT-AAACTACATGACTATTATACGGGTAA--TAAGAATGAAATGGTATAGG--ACATAATATTAAGTAATTATTCTCAAACATGAATATTGTCACAGTAATGGGTTATTTCTTAGTTCAGCTCATCACGAGAAATAAGCAACCCTTGTTAGTAAGATACAACATT…	---
Puerto Rico (PUR) Haplotype EiA09	---------------------------------------ACGCAGAAT---AAGC-GCC-AACACATAAACT---TACCTATATCCTC-TACCGTGCCCAGCAGACCAATATCCGCAACACTTACC-TATGTATTATTGTACATCTACTTATTTACCACTAGCATATGACCGGTAGTACTGCTGATTAATCTGACCTAAAA-CATAAAA--TTATTGG-TTTCACATAAACTGTTT-AAACTACATGACTATTATACGGGTAA--TAAGAATGAAATGGTATAGG--ACATAATATTAAGTAATTATTCTCAAACATGAATATTGTCACAGTAATGGGTTATTTCTTAGTTCAGCTCATCACGAGAAATAAGCAACCCTTGTTAGTAAGATACAACATT…	---
Puerto Rico (PUR) Haplotype EiA03	---------------------------------------ACGCAGAAT---AAGC-GCC-AACACATAAACT---TACCTATATCCTC-TACCGTGCCCAGCAGACCAATATCCGCAACACTTACC-TATGTATTATTGTACATCTACTTATTTACCGCTAGCATATGACCGGTAGTACTGCTGATTAATCTGACCTAAAA-CATAAAA--TTATTGG-TTTTACATAAACTGTTT-AAACTACATGACTATTATACGGGTAA--TAAGAATGAAATGGTATAGG--ACATAATATTAAGTAATTATTCTCAAACATGAATATTGTCACAGTAATGGGTTATTTCTTAGTTCAGCTCATCACGAGAAATAAGCAACCCTTGTTAGTAAGATACAACATT…	---
Puerto Rico (PUR) Haplotype EiA02	---------------------------------------ACGCAGAAT---AAGC-GCC-AACACATAAACT---TACCTATATCCTC-TACCGTGCCCAGCAGACCAATATCCGCAACACTTACC-TATGTACTATTGTACATCTACTTATTTACCACTAGCATATGACCAGTAGTACTGCTGATTAATCTGACCTAAAA-CATAAAA--TTATTGG-TTTTACATAAACTGTTT-AAACTACATGACTATTATACAGGTAA--TAAGAATGAAATGGTATAGG--ACATAATATTAAGTAATTATTCTCAAACATGAATATCGTCACAGTAATGGGTTATTTCTTAGTTCAGCTCATCACGAGAAATAAGCAATCCTTGTTAGTAAGATACAACATT…	---
Puerto Rico (PUR) Haplotype EiA51	---------------------------------------ACGCAGAAT---AAGC-GCC-AACACATAAACT---TACCTATATCCTC-TACCGTGCCCAGCAGACCAATATCCGCAACACTTACC-TATGTACTATTGTACATCTACTTATTTACCACTAGCATATGACCAGTAGTACTGCTGATTAATCTGACCTAAAA-CATAAAA--TTATTGG-TTTTACATAAACTGTTT-AAACTACATGACTATTATACAGGTAA--TAAGAATGAAATGGTATAGG--ACATAATATTAAGTAATTATTCTCAAACATGAATATCGTCACAGTAATGGGTTATTTCTTAGTTCAGCTCATCACGAGAAATAAGCAATCCTTGTTAGTAAGATACAACATT…	---
Puerto Rico (PUR) Haplotype EiA01	---------------------------------------ACGCAGAAT---AAGC-GCC-AACACATAAACT---TACCTATATCCTC-TACCGTGCCCAGCAGACCAATATCCGCAACACTTACC-TATGTACTATTGTACATCTACTTATTTACCACTAGCATATGACCAGTAGTACTGCTGATTAATCTGACCTAAAA-CATAAAA--TTATTGG-TTTTACATAAACTGTTT-AAACTACATGACTATTATACAGGTAA--TAAGAATGAAATGGTATAGG--ACATAATATTAAGTAATTATTCTCAAACATGAATATCGTCACAGTAATGGGTTATTTCTTAGTTCAGCTCATCACGAGAAATAAGCAATCCTTGTTAGTAAGATACAACATT…	---
Puerto Rico (PUR) Haplotype Ei A42	---------------------------------------ACGCAGAAT---AAGC-GCC-AACACATAAACT---TACCTATATCCTC-TACCGTGCCCAGCAGACCAATATCCGCAACACTTACC-TATGTATTATTGTACATCTACTTATTTACCGCTAGCATATGACCGGTAGTACTGCTGATTAATCTGACCTAAAA-CATAAAA--TTATTGG-TTTCACATAAACTGTTT-AAACTACATGACTATTATACAGGTAA--TAAGAATGAAATGGTATAGG--ACATAATATTAAGTAATTATTCTCAAACATGAATATTGTCACAGTAATGGGTTATTTCTTAGTTCAGCTCATCACGAGAAATAAGCAACCCTTGTTAGTAAGATACAACATT…	---
Puerto Rico (PUR) Haplotype Ei A28	---------------------------------------ACGCAGAAT---AAGC-GCC-AACACATAAACT---TACCTATATCCTC-TACCGTGCCCAGCAGACCAATATCCGCAACACTTACC-TATGTACTATTGTACATCTACTTATTTACCACTAGCATATGACCAGTAGTACTGCTGATTAATCTGACCTAAAA-CATAAAA--TTATTGG-TTTTACATAAACTGTTT-AAACTACATGACTATTATACAGGTAA--TAAGAATGAAATGGTATAGG--ACATAATATTAAGTAATTATTCTCAAACATGAATATCGTCACGGTAATGGGTTATTTCTTAGTTCAGCTCATCACGAGAAATAAGCAATCCTTGTTAGTAAGATACAACATT…	---
