# Supplementary material for: Low Diversity and Strong Genetic Structure Between Feeding and Nesting Areas in Brazil for the Critically Endangered Hawksbill Sea Turtle
Source: Frontiers journal article supplement (doi:10.3389/fevo.2021.704838), 2021-08-04
Supplement: Table_2.docx [file Table_2.docx]

**Supplemental material**

Supplementary table 1: Distribution of 33 haplotypes in the 15 populations of *Eretmochelys imbricata* evaluated in nesting and feeding areas.

| H | Corresponding haplotype from Genbank and this study  (see our nomenclature in supplementary table 3) | PI_BRA | PB_BRA | PE_BRA | BA_BRA | AL_BRA | RN_BRA | FN_BRA | AR_BRA | CR | ISR | MEX | MAS | CAR | AUS | PUR | **Nº** |
| --- | --- | --- | --- | --- | --- | --- | --- | --- | --- | --- | --- | --- | --- | --- | --- | --- | --- |
| H_1 | PI_BRAEi1; PI_BRAEi2; PI_BRAEi3; PI_BRAEi4; PB_BRAEi1; PB_BRAEi2; PB_BRAEi3; PB_BRAEi4; PB_BRAEi5; PB_BRAEi6; PB_BRAEi7; PB_BRAEi8; PB_BRAEi9; PB_BRAEi10; PB_BRAEi11; PB_BRAEi12;  PB_BRAEi14; PB_BRAEi15; PB_BRAEi16; PB_BRAEi18; PB_BRAEi23; PB_BRAEi24; PB_BRAEi25; PB_BRAEi26;  PB_BRAEi27; PE_BRAEi1; PE_BRAEi2; PE_BRAEi3; PE_BRAEi4; PE_BRAEi5; PE_BRAEi6; PE_BRAEi7;  PE_BRAEi8; PE_BRAEi9; PE_BRAEi11; PE_BRAEi12; PE_BRAEi13; BA_BRAEi1;  BA_BRAEi3; BA_BRAEi4; Al_BRAEi1; Al_BRAEi2; Al_BRAEi3; Al_BRAEi3; Al_BRAEi6; Al_BRAEi8;  Al_BRAEi9; Al_BRAEi11; RN_BRAEi1; RN_BRAEi2; RN_BRAEi3; RN_BRAEi4; RN_BRAEi6; RN_BRAEi7; RN_BRAEi8; RN_BRAEi9 (all of this study) | 4 | 21 | 12 | 3 | 8 | 8 | 0 | 0 | 0 | 0 | 0 | 0 | 0 | 0 | 0 | **56** |
| H_2 | PB_BRAEi13; PB_BRAEi19; PB_BRAEi20; PB_BRAEi21  PB_BRAEi22; Al_BRAEi5  Al_BRAEi7 (all of this study) | 0 | 5 | 0 | 0 | 2 | 0 | 0 | 0 | 0 | 0 | 0 | 0 | 0 | 0 | 0 | **7** |
| H_3 | PB_BRAEi17 (in this study); | 0 | 1 | 0 | 0 | 0 | 0 | 0 | 0 | 0 | 0 | 0 | 0 | 0 | 0 | 0 | **1** |
| H_4 | PE_BRAEi10 (in this study); | 0 | 0 | 1 | 0 | 0 | 0 | 0 | 0 | 0 | 0 | 0 | 0 | 0 | 0 | 0 | **1** |
| H_5 | BA_BRAEi2; RN_BRAEi5  (all of this study) | 0 | 0 | 0 | 1 | 0 | 1 | 0 | 0 | 0 | 0 | 0 | 0 | 0 | 0 | 0 | **2** |
| H_6 | Al_BRAEi10 (in this study); | 0 | 0 | 0 | 0 | 1 | 0 | 0 | 0 | 0 | 0 | 0 | 0 | 0 | 0 | 0 | **1** |
| H_7 | EiBR19 (Access Nº JX289891) | 0 | 0 | 0 | 0 | 0 | 0 | 1 | 0 | 0 | 0 | 0 | 0 | 0 | 0 | 0 | **1** |
| H_8 | EiBR18 (Access Nº JX289890)  EiBR6 (Access Nº JX289883)  EiA48 (Access Nº KC196501) | 0 | 0 | 0 | 0 | 0 | 0 | 0 | 2 | 0 | 0 | 0 | 0 | 1 | 0 | 0 | **3** |
| H_9 | EiBR17 (Access Nº JX289889)  EiA02 (Access Nº EF210781) | 0 | 0 | 0 | 0 | 0 | 0 | 0 | 1 | 0 | 0 | 0 | 0 | 0 | 0 | 1 | **2** |
| H_10 | EiBR15 (Access Nº JX289888)  EiBR13 (Access Nº JX289886)  EiA44 (Access Nº KC196503)  EiA83 (Access Nº KC196502)  EiA43 (Access Nº EF210794)  EiA41 (Access Nº EF210793)  EiA24 (Access Nº EF210792)  EiA23 (Access Nº EF210791)  EiA45 (Access Nº EF210785)  EiA11 (Access Nº EF210784)  EiA09 (Access Nº EF210783)  Ei-A42 (Access Nº EU113049) | 0 | 0 | 0 | 0 | 0 | 0 | 2 | 0 | 0 | 0 | 0 | 0 | 2 | 0 | 8 | **12** |
| H_11 | EiBR14 (Access Nº JX289887)  EI_EP06 (Access Nº KJ603534)  EI_EP04 (Access Nº KJ603532)  EiIP106 (Access NºKR012503)  EiIP72 (Access Nº KT964294 )  EiIP71 (Access Nº KT964293) | 0 | 0 | 0 | 0 | 0 | 0 | 1 | 0 | 0 | 0 | 3 | 0 | 0 | 2 | 0 | **6** |
| H_12 | EiIP131(Access Nº KX499511)  EiIP74 (Access Nº KT964296) | 0 | 0 | 0 | 0 | 0 | 0 | 0 | 0 | 1 | 0 | 0 | 0 | 0 | 1 | 0 | **2** |
| H_13 | RS4 (Access Nº AJ421797)  RS3 (Access Nº AJ421796) | 0 | 0 | 0 | 0 | 0 | 0 | 0 | 0 | 0 | 2 | 0 | 0 | 0 | 0 | 0 | **2** |
| H_14 | RS2 (Access Nº AJ421795) | 0 | 0 | 0 | 0 | 0 | 0 | 0 | 0 | 0 | 1 | 0 | 0 | 0 | 0 | 0 | **1** |
| H_15 | MYEi_F4  (Access Nº KM186920) | 0 | 0 | 0 | 0 | 0 | 0 | 0 | 0 | 0 | 0 | 0 | 1 | 0 | 0 | 0 | **1** |
| H_16 | MYEi_F3  (Access Nº KM186919) | 0 | 0 | 0 | 0 | 0 | 0 | 0 | 0 | 0 | 0 | 0 | 1 | 0 | 0 | 0 | **1** |
| H_17 | MYEi_F2  (Access Nº KM186918) | 0 | 0 | 0 | 0 | 0 | 0 | 0 | 0 | 0 | 0 | 0 | 1 | 0 | 0 | 0 | **1** |
| H_18 | MYEi_F1  (Access Nº KM186917) | 0 | 0 | 0 | 0 | 0 | 0 | 0 | 0 | 0 | 0 | 0 | 1 | 0 | 0 | 0 | **1** |
| H_19 | Ei-A72 (Access Nº GQ925509) | 0 | 0 | 0 | 0 | 0 | 0 | 0 | 0 | 0 | 0 | 0 | 0 | 1 | 0 | 0 | **1** |
| H_20 | EiIP73 (Access Nº KT964295) | 0 | 0 | 0 | 0 | 0 | 0 | 0 | 0 | 0 | 0 | 0 | 0 | 0 | 1 | 0 | **1** |
| H_21 | EiIP59 (Access Nº KT964292) | 0 | 0 | 0 | 0 | 0 | 0 | 0 | 0 | 0 | 0 | 0 | 0 | 0 | 1 | 0 | **1** |
| H_22 | EiIP39 (Access Nº KT964291) | 0 | 0 | 0 | 0 | 0 | 0 | 0 | 0 | 0 | 0 | 0 | 0 | 0 | 1 | 0 | **1** |
| H_23 | EiA68 (Access Nº EF210801)  EiA36 (Access Nº EF210797)  EiA01 (Access Nº EF210779) | 0 | 0 | 0 | 0 | 0 | 0 | 0 | 0 | 0 | 0 | 0 | 0 | 0 | 0 | 3 | **3** |
| H_24 | EiA60 (Access Nº EF210800) | 0 | 0 | 0 | 0 | 0 | 0 | 0 | 0 | 0 | 0 | 0 | 0 | 0 | 0 | 1 | **1** |
| H_25 | EiA59 (Access Nº EF210799) | 0 | 0 | 0 | 0 | 0 | 0 | 0 | 0 | 0 | 0 | 0 | 0 | 0 | 0 | 1 | **1** |
| H_26 | EiA58 (Access Nº EF210798) | 0 | 0 | 0 | 0 | 0 | 0 | 0 | 0 | 0 | 0 | 0 | 0 | 0 | 0 | 1 | **1** |
| H_27 | EiA29 (Access Nº EF210796)  EiA03 (Access Nº EF210782) | 0 | 0 | 0 | 0 | 0 | 0 | 0 | 0 | 0 | 0 | 0 | 0 | 0 | 0 | 2 | **2** |
| H_28 | EiA27 (Access Nº EF210795) | 0 | 0 | 0 | 0 | 0 | 0 | 0 | 0 | 0 | 0 | 0 | 0 | 0 | 0 | 1 | **1** |
| H_29 | EiA22 (Access Nº EF210790) | 0 | 0 | 0 | 0 | 0 | 0 | 0 | 0 | 0 | 0 | 0 | 0 | 0 | 0 | 1 | **1** |
| H_30 | EiA21 (Access Nº EF210789) | 0 | 0 | 0 | 0 | 0 | 0 | 0 | 0 | 0 | 0 | 0 | 0 | 0 | 0 | 1 | **1** |
| H_31 | EiA20 (Access Nº EF210788)  EiA47 (Access Nº EF210787)  EiA18 (Access Nº EF210786) | 0 | 0 | 0 | 0 | 0 | 0 | 0 | 0 | 0 | 0 | 0 | 0 | 0 | 0 | 3 | **3** |
| H_32 | EiA51 (Access Nº EF210780) | 0 | 0 | 0 | 0 | 0 | 0 | 0 | 0 | 0 | 0 | 0 | 0 | 0 | 0 | 1 | **1** |
| H_33 | Ei-A28 (Access Nº EU113048) | 0 | 0 | 0 | 0 | 0 | 0 | 0 | 0 | 0 | 0 | 0 | 0 | 0 | 0 | 1 | **1** |
| **Nº/Pop** |  | **4** | **27** | **13** | **4** | **11** | **9** | **4** | **3** | **1** | **3** | **3** | **4** | **4** | **6** | **25** | **-** |

Supplementary table 2: Haplotype data (mtDNA sequence) obtained from the Genbank database for the species *Eretmochelys imbricata* in feeding areas.

| **Haplotype** | **Accession Nº** | **URL** | **Reference** |
| --- | --- | --- | --- |
| **Brazil** | | |  |
| EiBR19 | JX289891 | https://www.ncbi.nlm.nih.gov/nuccore/480360219 | Vilaça et al., 2013 |
| EiBR18 | JX289890 | https://www.ncbi.nlm.nih.gov/nuccore/JX289890 | Vilaça et al., 2013 |
| EiBR17 | JX289889 | https://www.ncbi.nlm.nih.gov/nuccore/480360217 | Vilaça et al., 2013 |
| EiBR15 | JX289888 | https://www.ncbi.nlm.nih.gov/nuccore/480360216 | Vilaça et al., 2013 |
| EiBR14 | JX289887 | https://www.ncbi.nlm.nih.gov/nuccore/480360215 | Vilaça et al., 2013 |
| EiBR13 | JX289886 | https://www.ncbi.nlm.nih.gov/nuccore/480360214 | Vilaça et al., 2013 |
| EiBR12 | JX289885 | https://www.ncbi.nlm.nih.gov/nuccore/480360213 | Vilaça et al., 2013 |
| EiBR7 | JX289884 | https://www.ncbi.nlm.nih.gov/nuccore/480360212 | Vilaça et al., 2013 |
| EiBR6 | JX289883 | https://www.ncbi.nlm.nih.gov/nuccore/480360211 | Vilaça et al., 2013 |
| EiBR5 | JX289882 | https://www.ncbi.nlm.nih.gov/nuccore/480360210 | Vilaça et al., 2013 |
| EiA01 | EF210779 | https://www.ncbi.nlm.nih.gov/nuccore/EF210779 | Proietti et al., 2014 |
| EiA02 | EF210781 | https://www.ncbi.nlm.nih.gov/nuccore/EF210781 | Vilaça et al., 2013 |
| EiA09 | EF210783 | https://www.ncbi.nlm.nih.gov/nuccore/EF210783 | Proietti et al., 2014 |
| EiA11 | EF210784 | https://www.ncbi.nlm.nih.gov/nuccore/EF210784 | Vilaça et al., 2013 |
| EiA23 | EF210791 | https://www.ncbi.nlm.nih.gov/nuccore/EF210791 | Proietti et al., 2014 |
| EiA24 | EF210792 | https://www.ncbi.nlm.nih.gov/nuccore/EF210792 | Proietti et al., 2014 |
| Ei-A28 | EU113048 | https://www.ncbi.nlm.nih.gov/nuccore/EU113048 | Vilaça et al., 2013 |
| BR10 | DQ177340 | https://www.ncbi.nlm.nih.gov/nuccore/DQ177340 | Vilaça et al., 2013 |
| EiA45 | EF210785 | https://www.ncbi.nlm.nih.gov/nuccore/EF210785 | Vilaça et al., 2013 |
| BR9 | DQ177339 | https://www.ncbi.nlm.nih.gov/nuccore/DQ177339 | Vilaça et al., 2013 |
| BR16 | DQ177341 | https://www.ncbi.nlm.nih.gov/nuccore/DQ177341 | Vilaça et al., 2013 |
| EiIP-33 | KT934080 | <https://www.ncbi.nlm.nih.gov/nuccore/KT934080> | Vilaça et al., 2013 |
| **Costa Rica** | | |  |
| EiIP131 | KX499511 | https://www.ncbi.nlm.nih.gov/nuccore/1063455504 | --- |
| EiIP-33 | KT934080 | <https://www.ncbi.nlm.nih.gov/nuccore/KT934080> | Gaos et al., 2018 |
| EiIP74 | KT964296 | https://www.ncbi.nlm.nih.gov/nuccore/KT964296 | Gaos et al., 2018 |
| EiIP106 | KR012503 | https://www.ncbi.nlm.nih.gov/nuccore/KR012503 | Gaos et al., 2018 |
| EiIP115 | KR012505 | <https://www.ncbi.nlm.nih.gov/nuccore/KR012505> | Gaos et al., 2018 |
| **Israel** | | |  |
| RS4 | AJ421797 | https://www.ncbi.nlm.nih.gov/nuccore/39725402 | --- |
| RS3 | AJ421796 | https://www.ncbi.nlm.nih.gov/nuccore/39725401 | --- |
| RS2 | AJ421795 | https://www.ncbi.nlm.nih.gov/nuccore/39725400 | --- |
| **Mexico** | | |  |
| EI_EP06 | KJ603534 | https://www.ncbi.nlm.nih.gov/nuccore/665849228 | --- |
| EI_EP04 | KJ603532 | https://www.ncbi.nlm.nih.gov/nuccore/665849226 | --- |
| EiIP106 | KR012503 | https://www.ncbi.nlm.nih.gov/nuccore/926473804 | Gaos et al., 2016 |
| EiA01 | EF210779 | https://www.ncbi.nlm.nih.gov/nuccore/EF210779 | Labastida-Estrada et al., 2018 |
| EiA02 | EF210781 | https://www.ncbi.nlm.nih.gov/nuccore/EF210781 | Labastida-Estrada et al., 2018 |
| EiA09 | EF210783 | https://www.ncbi.nlm.nih.gov/nuccore/EF210783 | Labastida-Estrada et al., 2018 |
| EiA03 | EF210782 | https://www.ncbi.nlm.nih.gov/nuccore/124294799 | Labastida-Estrada et al., 2018 |
| EiA11 | EF210784 | https://www.ncbi.nlm.nih.gov/nuccore/EF210784 | Labastida-Estrada et al., 2018 |
| EiA23 | EF210791 | https://www.ncbi.nlm.nih.gov/nuccore/EF210791 | Labastida-Estrada et al., 2018 |
| EiA24 | EF210792 | https://www.ncbi.nlm.nih.gov/nuccore/EF210792 | Labastida-Estrada et al., 2018 |
| EiA36 | EF210797 | https://www.ncbi.nlm.nih.gov/nuccore/124294814 | Labastida-Estrada et al., 2018 |
| EiA41 | EF210793 | https://www.ncbi.nlm.nih.gov/nuccore/EF210793.1 | Labastida-Estrada et al., 2018 |
| EiA43 | EF210794 | https://www.ncbi.nlm.nih.gov/nuccore/EF210794.1 | Labastida-Estrada et al., 2018 |
| EiA51 | EF210780 | https://www.ncbi.nlm.nih.gov/nuccore/124294797 | Labastida-Estrada et al., 2018 |
| EiA58 | EF210798 | https://www.ncbi.nlm.nih.gov/nuccore/EF210798 | Labastida-Estrada et al., 2018 |
| EiA63 | KC196498 | https://www.ncbi.nlm.nih.gov/nuccore/KC196498 | Labastida-Estrada et al., 2018 |
| EiA83 | KC196502 | https://www.ncbi.nlm.nih.gov/nuccore/KC196502 | Labastida-Estrada et al., 2018 |
| EiIP74 | KT964296 | https://www.ncbi.nlm.nih.gov/nuccore/KT964296 | --- |
| **Malaysia** | | |  |
| MYEi_F4 | KM186920 | https://www.ncbi.nlm.nih.gov/nuccore/697063496 | --- |
| MYEi_F3 | KM186919 | https://www.ncbi.nlm.nih.gov/nuccore/697063495 | --- |
| MYEi_F2 | KM186918 | https://www.ncbi.nlm.nih.gov/nuccore/697063494 | --- |
| MYEi_F1 | KM186917 | https://www.ncbi.nlm.nih.gov/nuccore/697063493 | --- |
| EiIP-53 | KT934095 | https://www.ncbi.nlm.nih.gov/nuccore/KT934095 | Nishizawa et al., 2016 |
| EiIP-08 | KT934055 | https://www.ncbi.nlm.nih.gov/nuccore/KT934055 | Nishizawa et al., 2016 |
| EiIP122 | KR706173 | https://www.ncbi.nlm.nih.gov/nuccore/KR706173 | Nishizawa et al., 2016 |
| EiIP123 | KR706174 | https://www.ncbi.nlm.nih.gov/nuccore/KR706174 | Nishizawa et al., 2016 |
| EiIP-47 | KT934090 | https://www.ncbi.nlm.nih.gov/nuccore/KT934090 | Nishizawa et al., 2016 |
| EiIP71 | KT964293 | https://www.ncbi.nlm.nih.gov/nuccore/KT964293 | Nishizawa et al., 2016 |
| EiBR14 | JX289887 | https://www.ncbi.nlm.nih.gov/nuccore/480360215 | Nishizawa et al., 2016 |
| **Caribbean** | | |  |
| EiA44 | KC196503 | https://www.ncbi.nlm.nih.gov/nuccore/499263768 | --- |
| EiA83 | KC196502 | https://www.ncbi.nlm.nih.gov/nuccore/499263749 | --- |
| EiA48 | KC196501 | https://www.ncbi.nlm.nih.gov/nuccore/KC196501.1 | --- |
| Ei-A72 | GQ925509 | https://www.ncbi.nlm.nih.gov/nuccore/260779771 | Blumental et al., 2009 |
| EiA01 | EF210779 | https://www.ncbi.nlm.nih.gov/nuccore/EF210779 | Blumental et al., 2009; Richardson et al., 2009 |
| EiA02 | EF210781 | https://www.ncbi.nlm.nih.gov/nuccore/EF210781 | Cazabon-Mannette et al., 2016; Richardson et al., 2009 |
| EiA03 | EF210782 | https://www.ncbi.nlm.nih.gov/nuccore/124294799 | Blumental et al., 2009 |
| EiA09 | EF210783 | https://www.ncbi.nlm.nih.gov/nuccore/EF210783 | Cazabon-Mannette et al., 2016 |
| EiA11 | EF210784 | https://www.ncbi.nlm.nih.gov/nuccore/EF210784 | Blumental et al., 2009 |
| EiA18 | EF210786 | https://www.ncbi.nlm.nih.gov/nuccore/EF210786 | Blumental et al., 2009 |
| EiA20 | EF210788 | https://www.ncbi.nlm.nih.gov/nuccore/EF210788.1 | Blumental et al., 2009 |
| EiA24 | EF210792 | https://www.ncbi.nlm.nih.gov/nuccore/124294809 | Blumental et al., 2009 |
| EiA27 | EF210795 | https://www.ncbi.nlm.nih.gov/nuccore/124294812 | Cazabon-Mannette et al., 2016 |
| Ei-A28 | EU113048 | https://www.ncbi.nlm.nih.gov/nuccore/157043009 | Blumental et al., 2009 |
| EiA29 | EF210796 | https://www.ncbi.nlm.nih.gov/nuccore/EF210796.1 | Blumental et al., 2009 |
| BR10 | DQ177340 | https://www.ncbi.nlm.nih.gov/nuccore/DQ177340 | Cazabon-Mannette et al., 2016 |
| Ei-A42 | EU113049 | https://www.ncbi.nlm.nih.gov/nuccore/EU113049 | Cazabon-Mannette et al., 2016 |
| EiA43 | EF210794 | https://www.ncbi.nlm.nih.gov/nuccore/EF210794.1 | Cazabon-Mannette et al., 2016 |
| EiA45 | EF210785 | https://www.ncbi.nlm.nih.gov/nuccore/124294802 | Cazabon-Mannette et al., 2016 |
| EiA83 | KC196502 | https://www.ncbi.nlm.nih.gov/nuccore/KC196502 | Cazabon-Mannette et al., 2016 |
| **Australia** | | |  |
| EiIP74 | KT964296 | https://www.ncbi.nlm.nih.gov/nuccore/1013864166 | --- |
| EiIP73 | KT964295 | https://www.ncbi.nlm.nih.gov/nuccore/1013864165 | --- |
| EiIP72 | KT964294 | https://www.ncbi.nlm.nih.gov/nuccore/1013864164 | --- |
| EiIP71 | KT964293 | https://www.ncbi.nlm.nih.gov/nuccore/1013864163 | --- |
| EiIP59 | KT964292 | https://www.ncbi.nlm.nih.gov/nuccore/1013864162 | --- |
| EiIP39 | KT964291 | https://www.ncbi.nlm.nih.gov/nuccore/1013864161 | --- |
| EiIP-03 | KT934051 | https://www.ncbi.nlm.nih.gov/nuccore/KT934051 | Bell and Jensen, 2018 |
| EiIP-04 | KT934052 | https://www.ncbi.nlm.nih.gov/nuccore/KT934052 | Bell and Jensen, 2018 |
| EiIP-08 | KT934055 | https://www.ncbi.nlm.nih.gov/nuccore/KT934055 | Bell and Jensen, 2018 |
| EiBR14 | JX289887 | https://www.ncbi.nlm.nih.gov/nuccore/480360215 | Bell and Jensen, 2018 |
| EiIP71 | KT964293 | https://www.ncbi.nlm.nih.gov/nuccore/KT964293 | Bell and Jensen, 2018 |
| **Puerto Rico** | | |  |
| EiA68 | EF210801 | https://www.ncbi.nlm.nih.gov/nuccore/124294818 | Velez-Zuazo et al., 2008 |
| EiA60 | EF210800 | https://www.ncbi.nlm.nih.gov/nuccore/124294817 | Velez-Zuazo et al., 2008 |
| EiA59 | EF210799 | https://www.ncbi.nlm.nih.gov/nuccore/124294816 | Velez-Zuazo et al., 2008 |
| EiA58 | EF210798 | https://www.ncbi.nlm.nih.gov/nuccore/124294815 | Velez-Zuazo et al., 2008 |
| EiA36 | EF210797 | https://www.ncbi.nlm.nih.gov/nuccore/124294814 | Velez-Zuazo et al., 2008 |
| EiA29 | EF210796 | https://www.ncbi.nlm.nih.gov/nuccore/EF210796.1 | Velez-Zuazo et al., 2008 |
| EiA27 | EF210795 | https://www.ncbi.nlm.nih.gov/nuccore/124294812 | Velez-Zuazo et al., 2008 |
| EiA43 | EF210794 | https://www.ncbi.nlm.nih.gov/nuccore/EF210794.1 | Velez-Zuazo et al., 2008 |
| EiA41 | EF210793 | https://www.ncbi.nlm.nih.gov/nuccore/EF210793.1 | Velez-Zuazo et al., 2008 |
| EiA24 | EF210792 | https://www.ncbi.nlm.nih.gov/nuccore/124294809 | Velez-Zuazo et al., 2008 |
| EiA23 | EF210791 | https://www.ncbi.nlm.nih.gov/nuccore/EF210791.1 | Velez-Zuazo et al., 2008 |
| EiA22 | EF210790 | https://www.ncbi.nlm.nih.gov/nuccore/EF210790.1 | Velez-Zuazo et al., 2008 |
| EiA21 | EF210789 | https://www.ncbi.nlm.nih.gov/nuccore/EF210789.1 | Velez-Zuazo et al., 2008 |
| EiA20 | EF210788 | https://www.ncbi.nlm.nih.gov/nuccore/EF210788.1 | Velez-Zuazo et al., 2008 |
| EiA47 | EF210787 | https://www.ncbi.nlm.nih.gov/nuccore/EF210787.1 | Velez-Zuazo et al., 2008 |
| EiA18 | EF210786 | https://www.ncbi.nlm.nih.gov/nuccore/EF210786.1 | Velez-Zuazo et al., 2008 |
| EiA45 | EF210785 | https://www.ncbi.nlm.nih.gov/nuccore/124294802 | Velez-Zuazo et al., 2008 |
| EiA11 | EF210784 | https://www.ncbi.nlm.nih.gov/nuccore/EF210784.1 | Velez-Zuazo et al., 2008 |
| EiA09 | EF210783 | https://www.ncbi.nlm.nih.gov/nuccore/124294800 | Velez-Zuazo et al., 2008 |
| EiA03 | EF210782 | https://www.ncbi.nlm.nih.gov/nuccore/124294799 | Velez-Zuazo et al., 2008 |
| EiA02 | EF210781 | https://www.ncbi.nlm.nih.gov/nuccore/124294798 | Velez-Zuazo et al., 2008 |
| EiA51 | EF210780 | https://www.ncbi.nlm.nih.gov/nuccore/124294797 | Velez-Zuazo et al., 2008 |
| EiA01 | EF210779 | https://www.ncbi.nlm.nih.gov/nuccore/124294796 | Velez-Zuazo et al., 2008 |
| Ei-A42 | EU113049 | https://www.ncbi.nlm.nih.gov/nuccore/157043010 | Velez-Zuazo et al., 2008 |
| Ei-A28 | EU113048 | https://www.ncbi.nlm.nih.gov/nuccore/157043009 | Velez-Zuazo et al., 2008 |
| **Colombia** | | | |
| EiBR14 | JX289887 | https://www.ncbi.nlm.nih.gov/nuccore/480360215 | Trujillo-Arias et al., 2014 |
| EiIP74 | KT964296 | https://www.ncbi.nlm.nih.gov/nuccore/1013864166 | Trujillo-Arias et al., 2014 |
| EiIP106 | KR012503 | https://www.ncbi.nlm.nih.gov/nuccore/926473804 | Trujillo-Arias et al., 2014 |
| EiA01 | EF210779 | https://www.ncbi.nlm.nih.gov/nuccore/EF210779 | Trujillo-Arias et al., 2014 |
| EiA02 | EF210781 | https://www.ncbi.nlm.nih.gov/nuccore/EF210781 | Trujillo-Arias et al., 2014 |
| EiA09 | EF210783 | https://www.ncbi.nlm.nih.gov/nuccore/EF210783 | Trujillo-Arias et al., 2014 |
| EiA11 | EF210784 | https://www.ncbi.nlm.nih.gov/nuccore/EF210784 | Trujillo-Arias et al., 2014 |
| EiA45 | EF210785 | https://www.ncbi.nlm.nih.gov/nuccore/124294802 | Trujillo-Arias et al., 2014 |
| **Flórida** | | | |
| EiA01 | EF210779 | https://www.ncbi.nlm.nih.gov/nuccore/EF210779 | Wood et al., 2013 |
| EiA02 | EF210781 | https://www.ncbi.nlm.nih.gov/nuccore/EF210781 | Wood et al., 2013 |
| EiA09 | EF210783 | https://www.ncbi.nlm.nih.gov/nuccore/EF210783 | Wood et al., 2013 |
| EiA11 | EF210784 | https://www.ncbi.nlm.nih.gov/nuccore/EF210784 | Wood et al., 2013 |
| EiA20 | EF210788 | https://www.ncbi.nlm.nih.gov/nuccore/EF210788.1 | Wood et al., 2013 |
| EiA23 | EF210791 | https://www.ncbi.nlm.nih.gov/nuccore/EF210791.1 | Wood et al., 2013 |
| EiA43 | EF210794 | https://www.ncbi.nlm.nih.gov/nuccore/EF210794.1 | Wood et al., 2013 |
| EiA41 | EF210793 | https://www.ncbi.nlm.nih.gov/nuccore/EF210793.1 | Wood et al., 2013 |


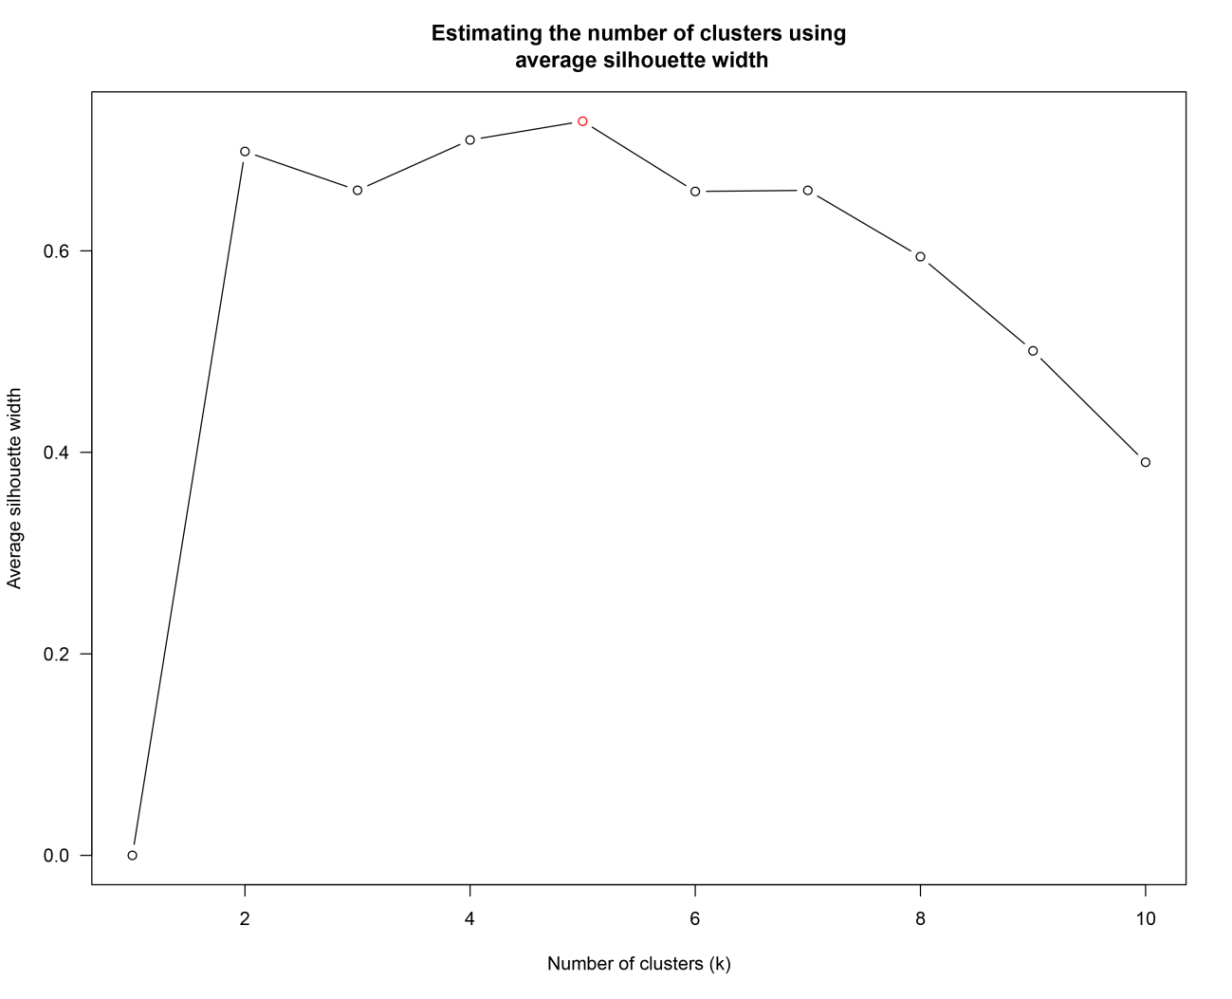


Supplementary Figure 1: Estimation of the number of groups, using the average method for the number of K populations with 120 individuals of *Eretmochelys imbricata* in 14 evaluated populations. The red dot indicates the most likely number of groups (K = 5).
